# Supplementary material
Source: publisher figshare collection journal article supplement (https://acs.figshare.com/ndownloader/files/5124286)

Synthesis of structurally defined scaffolds for bivalent ligand display based on glucuronic acid anilides. The degree of tertiary amide isomerism and folding depends on the configuration of a glycosyl azide.

*Manuela Tosin and Paul V. Murphy\**

Centre for Synthesis and Chemical Biology, Department of Chemistry, Conway Institute of Biomolecular and Biomedical Research, University College Dublin, Belfield, Dublin 4, Ireland

[Paul.V.Murphy@ucd.ie](mailto:Paul.V.Murphy@ucd.ie)

### **Index to supporting information**

|         |                                                                                                |
|---------|------------------------------------------------------------------------------------------------|
| S2-S9   | Experimental procedures                                                                        |
| S10-S22 | <sup>1</sup> H-NMR Spectra                                                                     |
| S22-S33 | 2D Spectra; Variable temperature spectra and calculation of EE:EZ ratios of selected compounds |

## **General Experimental Conditions**

Optical rotations were determined with at the sodium D line at 20 °C.  $^1\text{H}$  NMR Spectra were recorded at 300 and 500 MHz and  $^{13}\text{C}$  NMR spectra at 75 MHz or 125 MHz. All  $^{13}\text{C}$  spectra given are proton-decoupled. Chemical shifts are reported relative to internal  $\text{Me}_4\text{Si}$  in  $\text{CDCl}_3$  ( $\delta$  0.0) or HOD for  $\text{D}_2\text{O}$  ( $\delta$  4.79) for  $^1\text{H}$  and ( $\delta$  77.16) for  $^{13}\text{C}$ .  $^{13}\text{C}$  signals were assigned with the aid of DEPT-135.  $^1\text{H}$  signals were assigned with the aid of 2D-COSY. Homonuclear coupling constants (Hz) were determined from the corresponding  $^1\text{H}$  spectra. The use of presaturation for solvent suppression was carried out in recording the  $^1\text{H}$ -NMR spectrum of **16**. TLC was performed on aluminium sheets precoated with Silica Gel 60 ( $\text{HF}_{254}$ , E. Merck) and spots visualized by UV and charring with  $\text{H}_2\text{SO}_4$ -EtOH (1:20). Flash Column Chromatography was carried out with Silica Gel 60 (0.040-0.630 mm, E. Merck) and using a stepwise solvent polarity gradient (starting from the conditions indicated in each case and increasing the polarity) correlated with TLC mobility. Chromatography solvents used were EtOAc (Riedel-deHaen), MeOH (Riedel-deHaen) and petroleum ether (b.p. 40-60°C, BDH laboratory supplies). Reaction solvents were freshly dried and distilled where stated: Acetonitrile, toluene and  $\text{CH}_2\text{Cl}_2$  from calcium hydride, methanol from magnesium turnings and THF from sodium/benzophenone; anhydrous DMF and pyridine were used as purchased from Sigma-Aldrich. Semi-prep HPLC was carried out using acetonitrile/water mixtures as eluant with a flow rate of 10 mL/min. The semi preparative columns used were YMC-Pack C-4 (S-10 $\mu\text{m}$ , 250 x 20mm) and YMC-Pack ODS-AQ (S5 $\mu\text{m}$ , 250 x 20 mm), both reverse phase. Wavelength for semi preparative HPLC was 220 nm.

### **NOE and ROE Experiments**

These NMR spectra were collected on a 500 MHz Spectrometer. All samples were made up in CDCl<sub>3</sub> or D<sub>2</sub>O or D<sub>2</sub>O:H<sub>2</sub>O (10:90) at concentrations of 2.0 – 10.0 mg/mL. The spectra were run at temperatures of 5 °C or 30 °C with water suppression (transmitter presat) where appropriate. 2D NOESY ( $\tau_{\text{mix}} = 0.4\text{-}1.0$  s) and 2D TROESY (transverse-ROESY) spectra ( $\tau_{\text{mix}} = 0.4\text{-}0.5$  s) the phase-sensitive mode using States-TPPI for F1-quadrature detection in the indirect dimension with relaxation delays of 2.5 seconds (2048 in F2 and 1024 in F1 points were used). In the TROESY sequence the strength of the pulsed spin lock field(B1) was 2.2KHz. The 1D-NOE experiments were collected using a double pulsed field gradient spin echo 1D NOE sequence (DPFGNOE).

### **IR Spectroscopic studies**

The data in Table 4 was obtained on an instrument with resolution of 2 cm<sup>-1</sup> and spectra were recorded from 5000 to 400 cm<sup>-1</sup>. The solution studies in CDCl<sub>3</sub> and CHCl<sub>3</sub> were recorded in KBr cells at concentrations of compounds of 1-2 mg/mL and for measurements in CCl<sub>4</sub> were recorded at concentrations <0.5 mg/mL. The absorbtion frequencies obtained for secondary amides were the same over a range of concentrations. Spectra recorded in the solid state were of pure solids and measured by diffuse reflectance.

### **Molecular modelling**

Monte Carlo conformational searches were carried out using Macromodel 8.5. The number of conformers generated was 20,000 and each was minimized using Merck Molecular Force Field (MMFF94). Structures greater than 10 kJ/mol above the lowest energy structure found were discarded. The H<sub>4</sub>-C<sub>4</sub>-O-H torsion was also constrained to both exclude hydrogen bonding with carbonyl group in order to prevent bias towards model structures with only these features.

Calculations were also carried out allowing this hydrogen bonding and low energy conformers with similar features were obtained. The MMFF94 force field was chosen over other force fields as it provided the most reasonable geometries for the azide groups. When conformer minimization had not converged then all structures in the output file were re-minimized using the MULT facility. Selected low energy structures obtained from the conformational search were optimized using DFT at the BLYP level of theory with the 6-31+G\*\* basis set using Jaguar.

**General deacetylation procedure:** Sodium methoxide (0.01 mL of a freshly prepared 1.0 M solution in MeOH) was added to an ice-cold solution of reactant in methanol and the reactions were left to stir for 1h. The solvent was then evaporated and the residue was dissolved in water. The pH was lowered to 6.0 by adding Amberlite IR-120 (H<sup>+</sup>) and filtration and freeze-drying afforded the desired compounds.

**2,4-Di-*O*-acetyl-1-azido-3-*O*-*tert*-butyldimethylsilyl-1-deoxy- $\beta$ -D-glucopyranuronic acid, allyl ester**

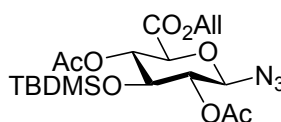

To an ice-cold solution of allyl ester **22** (0.311 g, 0.906 mmol) in dry dichloromethane (10 mL), 2,6-lutidine (0.66 mL, 5.685 mmol) and *tert*-butyldimethylsilyl triflate (1.7 mL, 7.402 mmol) were added, respectively. The reaction was kept at 0 °C for 20 minutes and then warmed to room temperature. Deionised water (10 mL) was added and the two phases stirred for 10 minutes before separation. The organic layer was dried (Na<sub>2</sub>SO<sub>4</sub>), filtered and concentrated and the title compound obtained as a colourless syrup (0.485 g). This crude product can be carried on directly to the next step. Purification

by column chromatography (EtOAc: cyclohexane, 1:4) gave a sample for analytical purposes (0.135 g, 21%);  $^1\text{H-NMR}$  (300 MHz,  $\text{CDCl}_3$ ):  $\delta$  5.91 (m, 1H,  $\text{CH}=\text{CH}_2$ ), 5.33 (m, 2H,  $\text{CH}=\text{CH}_2$ ), 5.10 (dd, 1H,  $J_{3,4}$  8.9, H-4), 4.94 (apt t, 1H,  $J_{2,3}$  8.9, H-2), 4.62 (m, 2H,  $\text{OCH}_2\text{CH}=\text{CH}_2$ ), 4.46 (d, 1H,  $J_{1,2}$  8.8, H-1), 3.98 (d, 1H,  $J_{4,5}$  10.0, H-5), 3.89 (apt t, 1H, H-3), 2.12, 2.06 (each s, each 3H, each  $\text{COCH}_3$ ), 0.81 (s, 9H,  $\text{SiC}(\text{CH}_3)_3$ ), 0.05 (s, 6H,  $\text{Si}(\text{CH}_3)_2$ );  $^{13}\text{C-NMR}$  ( $\text{CDCl}_3$ ):  $\delta$  169.3, 169.1 (each s, each  $\text{COCH}_3$ ), 166.4 (s,  $\text{COOAl}$ ), 131.1 (d,  $\text{CH}=\text{CH}_2$ ), 119.5 (t,  $\text{CH}=\text{CH}_2$ ), 88.0 (d, C-1), 74.5, 72.7, 72.6, 71.6 (each d, C-2—5), 66.7 (t,  $\text{OCH}_2\text{CH}=\text{CH}_2$ ), 25.4 (q,  $\text{SiC}(\text{CH}_3)_3$ ), 21.0, 20.9 (each q, each  $\text{COCH}_3$ ), 17.7 (s,  $\text{SiC}(\text{CH}_3)_3$ ), -4.6, -4.6 (each q, each  $\text{Si}(\text{CH}_3)_2$ ); FTIR ( $\text{CH}_2\text{Cl}_2$  solution): 2956, 2859, 2121, 1755, 1474, 1389,  $1220\text{ cm}^{-1}$ ; ES-HRMS: Found 480.1788, required 480.1778  $[\text{M}+\text{Na}]^+$ .

## 2,4-Di-*O*-acetyl-1-azido-3-*O*-*tert*-butyldimethylsilyl-1-deoxy- $\beta$ -D-glucopyranuronic acid

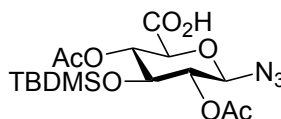

The allyl ester prepared as described above (0.485 g,  $\sim 0.906$  mmol) was dissolved in freshly distilled acetonitrile (10 mL) and reacted at  $0^\circ\text{C}$  with  $\text{Pd}(\text{Ph}_3)_4$  (0.104 g, 0.090 mmol) and pyrrolidine (0.10 mL, 1.200 mmol) for 30 minutes. The mixture was filtered through celite and the solvent evaporated; the yellow oily residue was taken into EtOAc and washed with deionised water. The two layers were separated and the aqueous phase, containing the carbohydrate product, was acidified to pH 2 using Amberlite IR-120. The beads were filtered off and the filtrate shaken with EtOAc to extract the sugar back into organic phase. After drying ( $\text{Na}_2\text{SO}_4$ ), filtration and evaporation under reduced pressure of the organic layer gave the title compound as an orange solid (0.259 g, 68% over two steps);  $[\alpha]_{\text{D}} -40^\circ$  ( $c$  0.2,  $(\text{CH}_3)_2\text{CO}$ );  $^1\text{H-NMR}$  (300 MHz,  $\text{CDCl}_3$ ):  $\delta$  7.00 (br s, 1H,  $\text{COOH}$ ), 5.13 (apt t, 1H,  $J_{3,4}$  8.9, H-4), 4.93 (apt t, 1H,  $J_{2,3}$  8.8, H-2), 4.52 (d, 1H,  $J_{1,2}$  8.8, H-1), 4.03 (d, 1H,  $J_{4,5}$  9.8, H-5), 3.92 (apt t, 1H,

H-3) , 2.13, 2.10 (each s, each 3H, each COCH<sub>3</sub>), 0.82 (s, 9H, SiC(CH<sub>3</sub>)<sub>3</sub>), 0.05 (s, 6H, Si(CH<sub>3</sub>)<sub>2</sub>); <sup>13</sup>C-NMR (CDCl<sub>3</sub>): δ 170.1, 170.0 (each s, each COCH<sub>3</sub>), 169.2 (s, COOH), 87.9 (d, C-1), 73.8, 72.6, 72.5, 71.4 (each d, C-2— 5), 25.4 (q, SiC(CH<sub>3</sub>)<sub>3</sub>), 21.0, 20.9 (each q, each COCH<sub>3</sub>), 17.8 (s, SiC(CH<sub>3</sub>)<sub>3</sub>), -4.6, -4.7 (each q, each Si(CH<sub>3</sub>)<sub>2</sub>); FTIR (KBr): 3447, 2962, 2916, 2859, 2121, 1753, 1375, 1224, 1093, 1037, 842 cm<sup>-1</sup>; ES-HRMS: Found 440.1455, required 440.1465 [M+Na]<sup>+</sup>.

**Preparation of 18.** 2,4-Di-*O*-acetyl-1-azido-3-*O*-*tert*-butyldimethylsilyl-1-deoxy-β-D-glucopyranuronic acid (0.052 g, 0.125 mmol), HOBt (0.024 g, 0.178 mmol), *p*-phenyldiamine (0.007 g, 0.065 mmol) and DIPEA (0.02 mL, 0.115 mmol) in freshly distilled dichloromethane (1 mL) were reacted under N<sub>2</sub> atmosphere with EDCI (0.031 g, 0.165 mmol) for 30 minutes at 0 °C and 3 days at room temperature. The solution was then diluted with dichloromethane (5 mL) and deionised water (5 mL) added: the two phases were vigorously stirred for 10 minutes and separated. The organic layer was dried (Na<sub>2</sub>SO<sub>4</sub>), filtered and concentrated under reduced pressure: the residue (0.064 g) was purified by slow column chromatography (dichloromethane: EtOAc, 15:1) to give **18** as a white solid (0.021 g, 36%), R<sub>f</sub> 0.68 (EtOAc: dichloromethane, 1:4), [α]<sub>D</sub> -54° (c 0.3, (CH<sub>3</sub>)<sub>2</sub>CO); <sup>1</sup>H-NMR (300 MHz, CDCl<sub>3</sub>): δ 7.99 (s, 2H, NH), 7.42 (s, 4H, Ar H), 5.12 (apt t, 2H, J<sub>3,4</sub> 9.0, H-4), 4.95 (apt t, 2H, J<sub>2,3</sub> 8.8, H-2), 4.65 (d, 2H, J<sub>1,2</sub> 9.0, H-1), 4.00 (d, 2H, J<sub>4,5</sub> 9.6, H-5), 3.95 (apt t, 2H, H-3) , 2.15, 2.13 (each s, each 6H, each COCH<sub>3</sub>), 0.82 (s, 18H, SiC(CH<sub>3</sub>)<sub>3</sub>), 0.07 (s, 12H, Si(CH<sub>3</sub>)<sub>2</sub>); <sup>13</sup>C-NMR (CDCl<sub>3</sub>): δ 169.6, 169.1 (each s, each COCH<sub>3</sub>), 164.3 (s, CONH), 133.4 (s, Ar C), 121.6 (d, Ar CH), 88.2 (d, C-1), 75.2, 72.8, 72.5, 71.8 (each d, C-2— 5), 25.4 (q, SiC(CH<sub>3</sub>)<sub>3</sub>), 21.1, 21.0 (each q, each COCH<sub>3</sub>), 17.8 (s, SiC(CH<sub>3</sub>)<sub>3</sub>), -4.6, -4.7 (each q, each Si(CH<sub>3</sub>)<sub>2</sub>); FTIR (KBr): 3431, 2958, 2947, 2121, 1755, 1671, 1623, 1374, 1251, 1220, 1152, 1091, 1037, 839, 780 cm<sup>-1</sup>; ES-HRMS: Found 907.3654, required 907.3689 [M+H]<sup>+</sup>.

**Preparation of 19.** Compound **18** (0.026 mg, 0.028 mmol) was dissolved in anhydrous DMF (1.0 mL) and cooled to 0 °C under nitrogen. Sodium hydride (60 % dispersion in mineral oil, 0.005 g, 0.125 mmol) and methyl iodide (0.01 mL, 0.160 mmol) were added respectively. The reaction was judged to be complete after 40 min and water and EtOAc were added and the layers separated. The organic layer was dried (Na<sub>2</sub>SO<sub>4</sub>) and the solvent removed: the residual yellow oil was subjected to silica gel chromatography (EtOAc: dichloromethane, 1:15) to give the title compound as a white solid (0.021 g, 80%), [ $\alpha$ ]<sub>D</sub> +21° (c 0.8, (CH<sub>3</sub>)<sub>2</sub>CO); FTIR (KBr): 2957, 2932, 2858, 1220, 1756, 1674, 1511, 1373, 1219, 1072, 1036, 841 cm<sup>-1</sup>; ES-HRMS: Found 935.3959, required 935.4002 [M+H]<sup>+</sup>; <sup>1</sup>H-NMR at room temperature displayed very broad signals while at 5 °C two sets of signals were detected. For the EE symmetric compound (63% by NMR integration): <sup>1</sup>H-NMR (500 MHz, CDCl<sub>3</sub>, 5 °C): δ 7.45 (br s, 4H, Ar H), 5.27 (apt t, 2H, *J*<sub>3,4</sub> 9.0, H-4), 4.68 (apt t, 2H, *J*<sub>2,3</sub> 9.0, H-2), 4.09 (d, 2H, *J*<sub>1,2</sub> 8.9, H-1), 4.02 (d, 2H, *J*<sub>4,5</sub> 9.9, H-5), 3.79 (apt t, 2H, H-3), 3.29 (s, 6H, NCH<sub>3</sub>), 2.12 (s, 6H, COCH<sub>3</sub>), 2.06 (s, 6H, COCH<sub>3</sub>, overlapping with one COCH<sub>3</sub> of *EZ*), 0.81 (s, 18H, SiC(CH<sub>3</sub>)<sub>3</sub>, overlapping with *EZ* signals), 0.01, 0.00 (each s, each 6H, each Si(CH<sub>3</sub>)<sub>2</sub>); <sup>13</sup>C-NMR (CDCl<sub>3</sub>, 5 °C): δ 169.2, 169.0 (each s, each COCH<sub>3</sub>), 164.8 (s, CONMe), 142.4 (s, Ar C), 128.6 (d, Ar CH), 88.1 (d, C-1), 74.2, 72.5, 72.4, 72.0 (each d, C-2—5), 39.0 (q, NCH<sub>3</sub>), 25.4 (q, SiC(CH<sub>3</sub>)<sub>3</sub>, overlapping with *EZ* signals), 21.4, 21.1 (each q, each COCH<sub>3</sub>), 17.8 (s, SiC(CH<sub>3</sub>)<sub>3</sub>), -4.4, -4.6 (each q, each Si(CH<sub>3</sub>)<sub>2</sub>); For the EZ asymmetric compound (37%), <sup>1</sup>H-NMR (500 MHz, CDCl<sub>3</sub>, 5 °C)<sup>1</sup>: δ 7.33 (br s, 4H, Ar H), 5.42 (apt t, 1H, *J*<sub>3,4</sub> 9.5, H-4), 5.35 (apt t, 1H, *J*<sub>3',4'</sub> 9.5, H-4'), 5.01 (apt t, 1H, *J*<sub>2',3'</sub> 9.0, H-2'), 4.80 (apt t, 1H, *J*<sub>2,3</sub> 9.0, H-2), 4.54 (d, 1H, *J*<sub>1',2'</sub> 8.9, H-1'), 4.32 (d, 1H, *J*<sub>4',5'</sub> 9.7, H-5'), 3.99 (d, 1H, *J*<sub>1,2</sub> 8.9, H-1), 3.95 (apt t, 1H, H-3'), 3.88 (d, 1H, *J*<sub>4,5</sub> 9.4, H-5), 3.69 (apt t, 1H, H-3), 3.60 (s, 3H, NCH<sub>3</sub>), 3.29 (s, 3H, NCH<sub>3</sub>, overlapping with NMe of *EE*), 2.17 (s, 3H, COCH<sub>3</sub>), 2.09 (s, 3H, COCH<sub>3</sub>), 2.06 (two s, each 3H, each

<sup>1</sup> The ' denotes signals belonging to the Z sugar residue.

COCH<sub>3</sub>, overlapping with COCH<sub>3</sub> of *EE*), 0.84 (two s, each 3H, each SiC(CH<sub>3</sub>)<sub>3</sub>), 0.81 (four s, each 3H, each SiC(CH<sub>3</sub>)<sub>3</sub>, overlapping with *EE* signals), 0.08 (two s overlapping, each 3H, each Si(CH<sub>3</sub>)<sub>2</sub>), 0.06, -0.02 (each s, each 3H, each Si(CH<sub>3</sub>)<sub>2</sub>); <sup>13</sup>C-NMR (CDCl<sub>3</sub>, 5°C, selected signals): δ 169.7, 169.5 (each s, each COCH<sub>3</sub>), 169.2 (s, COCH<sub>3</sub>, overlapping with *EE* signals), 168.5 (s, COCH<sub>3</sub>), 165.7, 164.7 (each s, each CONMe), 143.4, 140.9 (each s, each Ar C ipso), 128.2, 127.4 (each d, each Ar CH), 88.5, 88.4 (each d, C-1 and C-1'), 72.7 (two signals overlapping), 72.6, 71.1, 71.1 (each d, carbohydrate ring CHs), 38.2, 38.1 (each q, each NCH<sub>3</sub>).

### 2,3,4,6-Tetra-*O*-acetyl-α-D-mannopyranosyl trichloroacetimidate **23**

Penta-*O*-acetyl-α/β-D-mannopyranoside (13.98 g, 35.81 mmol) and benzylamine (5.90 mL, 54.01 mmoles) in THF (140 mL) were stirred for 20 h at room temperature, after which the reaction did not seem to proceed further. The solvent was evaporated and the crude material was taken into dichloromethane and washed progressively with HCl 1.0 M (50 mL x 2), sodium hydrogen carbonate (satd. aq., 50 mL) and deionised water (50 mL). The organic layer was dried over Na<sub>2</sub>SO<sub>4</sub> and concentrated leaving a yellow oil (17.97 g) that was subjected to column chromatography (EtOAc: petroleum ether, 1:4) gave 2,3,4,6-tetra-*O*-acetyl-D-mannopyranose (12.48 g, 99%), R<sub>f</sub> 0.38 (EtOAc: petroleum ether, 1:1). NMR data (<sup>1</sup>H and <sup>13</sup>C) were in agreement with those described in the literature;<sup>2</sup> <sup>1</sup>H-NMR (300 MHz, CDCl<sub>3</sub>) δ 5.43 (dd, 1H, *J*<sub>2,3</sub> 3.2, *J*<sub>3,4</sub> 10.0, H-3), 5.31 (apt t, 1H, *J*<sub>4,5</sub> 9.5, H-4, overlapping with H-2), 5.28 (dd, 1H, *J*<sub>1,2</sub> 1.8, H-2, overlapping with H-4), 5.25 (dd, 1H, *J*<sub>OH,H-1</sub> 4.0, H-1), 4.24 (m, 2H, *J*<sub>5,6</sub> 2.5, *J*<sub>5,6'</sub> 5.0, H-5 and H-6), 4.13 (apt dd, 1H, *J*<sub>6,6'</sub> 8.0, H-6'), 3.16 (d, 1H, OH), 2.17, 2.11, 2.05, 2.00 (each s, each 3H, each COCH<sub>3</sub>); <sup>13</sup>C-NMR (CDCl<sub>3</sub>): 171.2, 170.5, 170.4, 170.1 (each s, each COCH<sub>3</sub>), 92.4 (d, C-1), 70.3, 69.0, 68.7, 66.4 (each d, C-2—5), 62.8 (t, C-

<sup>2</sup> Ponpipom, M. M.; Bugianesi, R. L.; Shen, T. Y. *Carbohydr. Res.* **1980**, 82, 141.



6), 21.1, 21.0, 21.0, 20.9 (each q, each COCH<sub>3</sub>). To this hemiacetal (1.243 g, 3.564 mmol) in anhydrous dichloromethane (50 mL), in presence of 4 Å molecular sieves and under N<sub>2</sub>, trichloroacetonitrile (4.3 mL, 42.884 mmol) and sodium hydride (60% dispersion in mineral oil, 0.214 g, 5.350 mmol) were added respectively. After an hour the solution was filtered through Celite and concentrated and the crude residue was purified by column chromatography (EtOAc: petroleum ether, 1:2) to yield **24** as a foam (1.264 g, 90%), R<sub>f</sub> 0.56 (EtOAc: petroleum ether, 1:1); <sup>1</sup>H-NMR (300 MHz, CDCl<sub>3</sub>) δ 8.79 (s, 1H, NH), 6.28 (d, 1H, J<sub>1,2</sub> 1.8, H-1), 5.43 (m, 1H, H-2), 5.40 (m, 2H, H-3 and H-4), 4.20 (m, 3H, H-5, H-6 and H-6'), 2.20, 2.08, 2.07, 2.01 (each s, each 3H, each COCH<sub>3</sub>); <sup>13</sup>C-NMR (CDCl<sub>3</sub>): 170.8, 170.1, 170.0, 169.9 (each s, each COCH<sub>3</sub>), 160.0 (s, CNH), 94.8 (d, C-1), 71.5, 69.0, 68.1, 65.6 (each d, C-2—5), 62.3 (t, C-6), 21.0, 20.9 (two signals overlapping), 20.8 (each s, each COCH<sub>3</sub>).

<sup>1</sup>H-NMR of

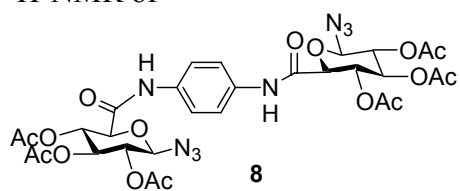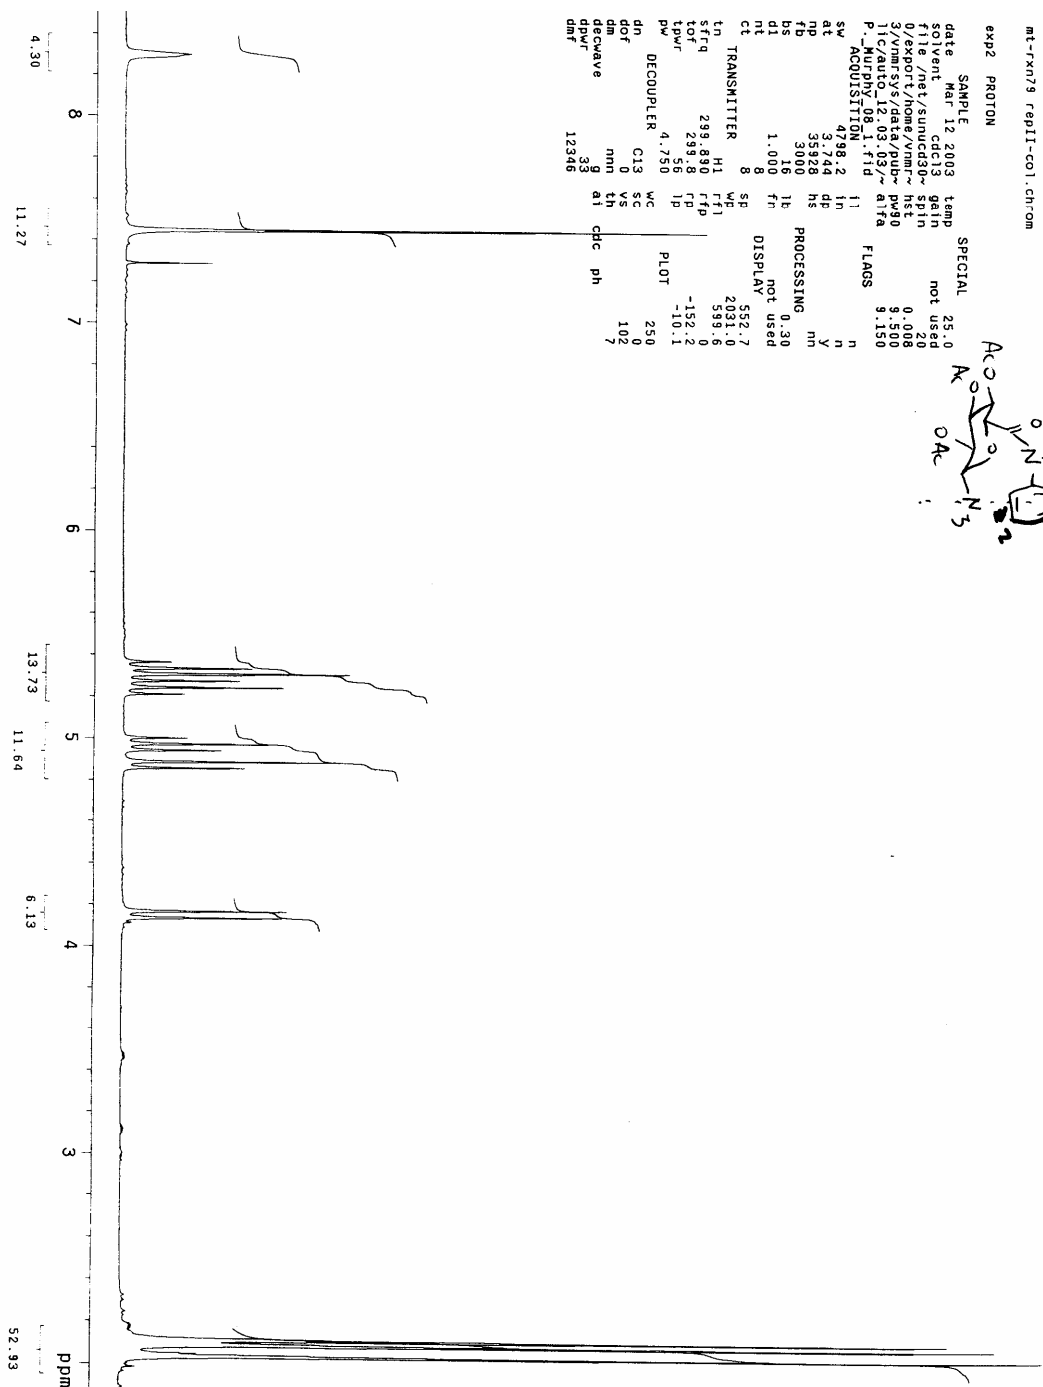

at-rxn/9 repli-col.chrom

exp2 PROTON

SAMPLE date Mar 12 2003 temp 25.0 SPECIAL

solvent cdcl3 gain not used

0/export/home/vnmr2

3/vnmr3/data/pub-pw90

1/c/auio\_12.03.03/~ atfa

P-Murphy-08-1.fid

ACQUISITION

sv 4798.2 in 11

st 4798.2 in 11

nd 35828 hs 16

fb 3000

bs 16

dt 1.000 fm

nt 8

ct TRANSMITTER 8 SP

tn 299.890 rf

sfreq 299.890 rf

tor 299.8 rf

tpwr 4.750 lp

pw DECOUPLER C13

dn 0 vs

dof 0 vs

dm mn

decwave 35

dpr 12346

cdcl3 ph

PROCESSING

nm

0.30

not used

DISPLAY

552.7

252.7

559.6

-152.2

-10.1

250

102

7

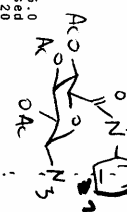

**9**

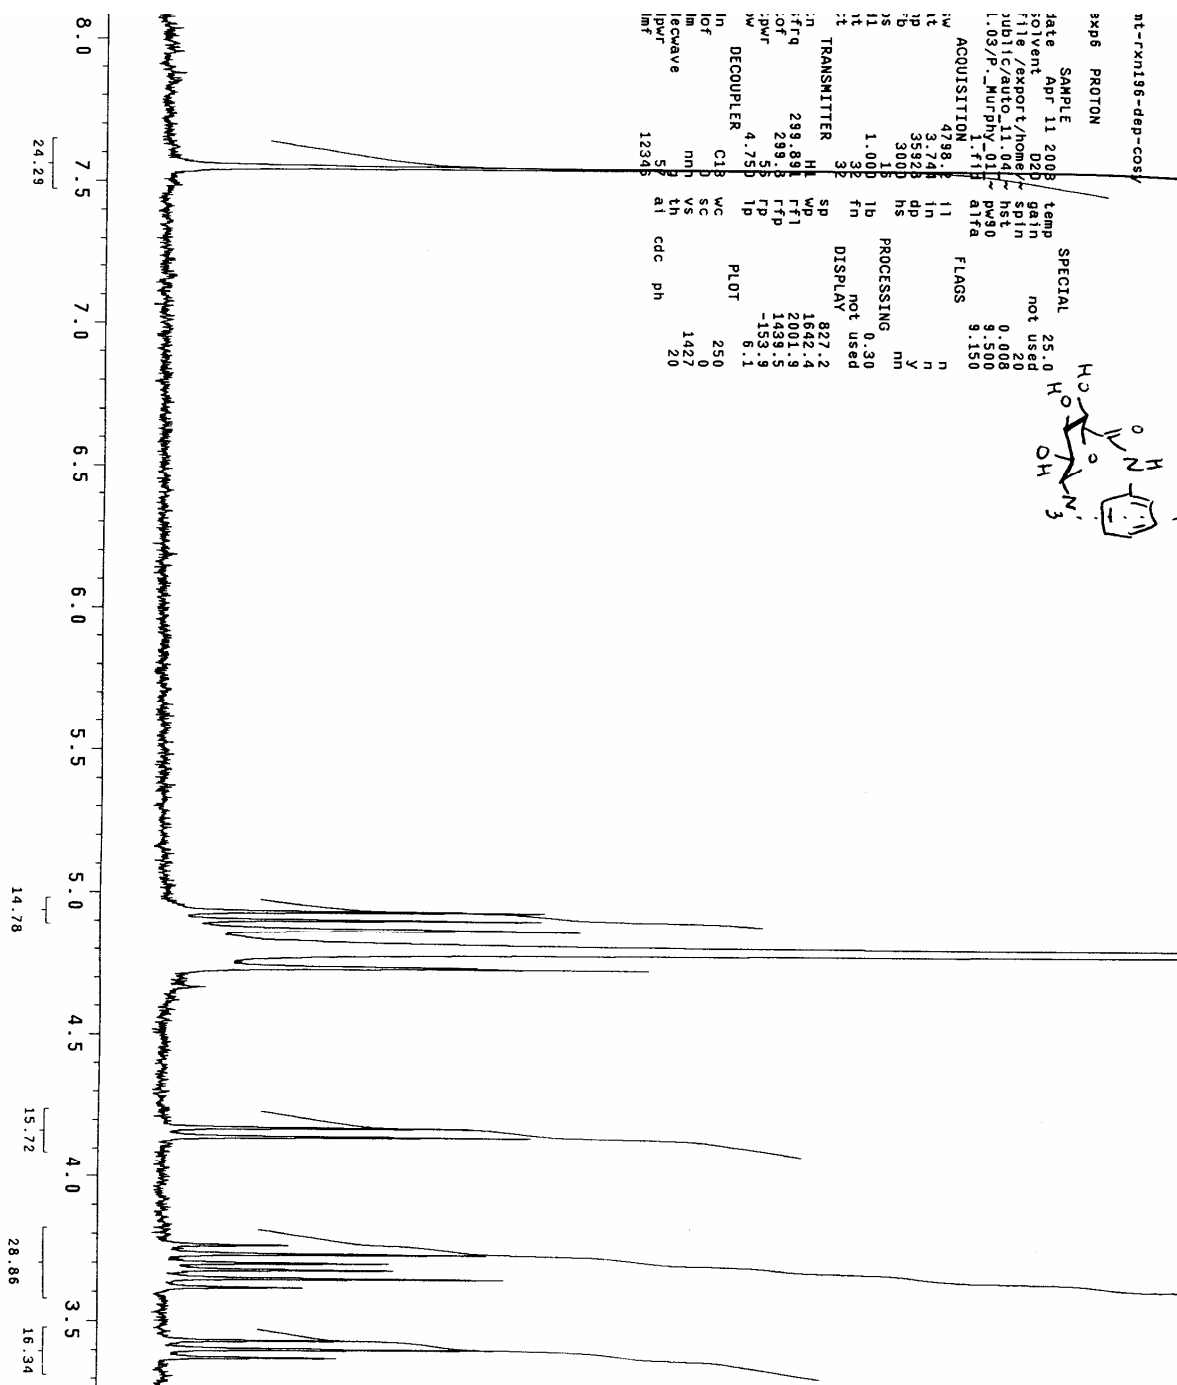

<sup>1</sup>H-NMR of

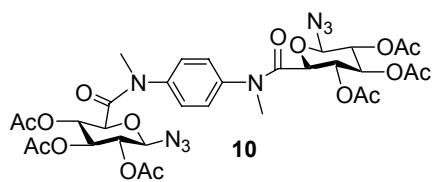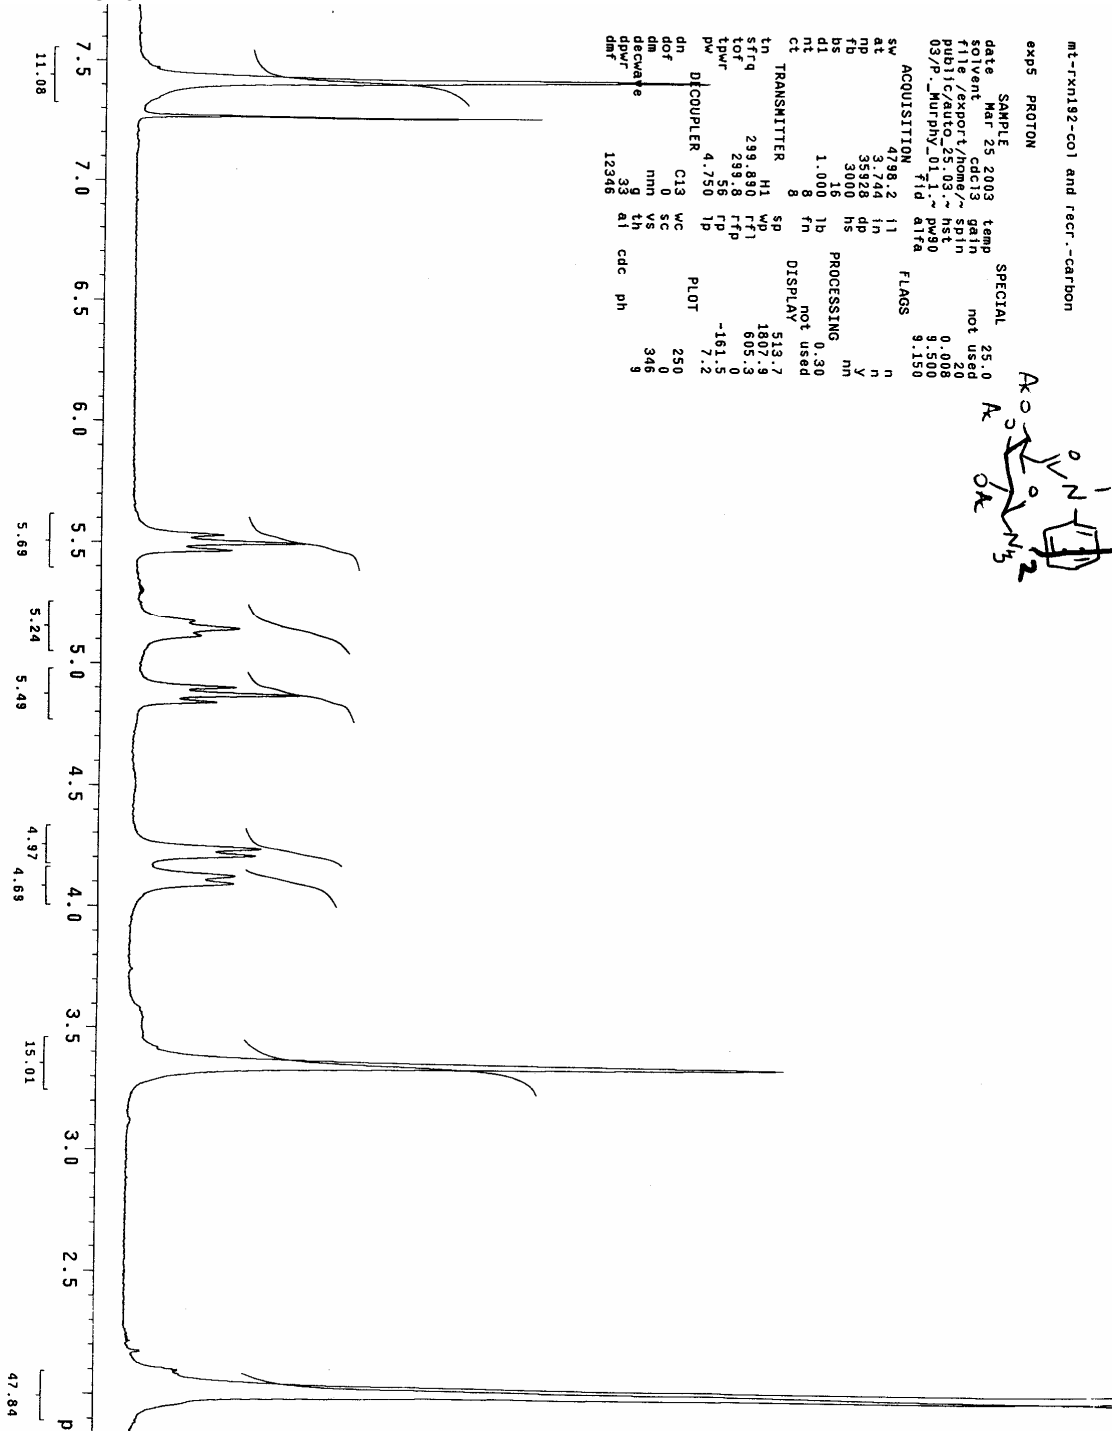

<sup>1</sup>H-NMR of
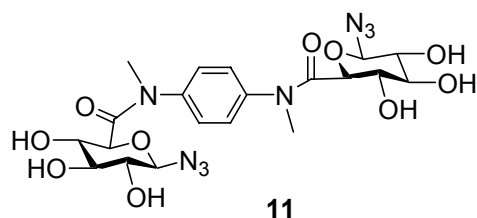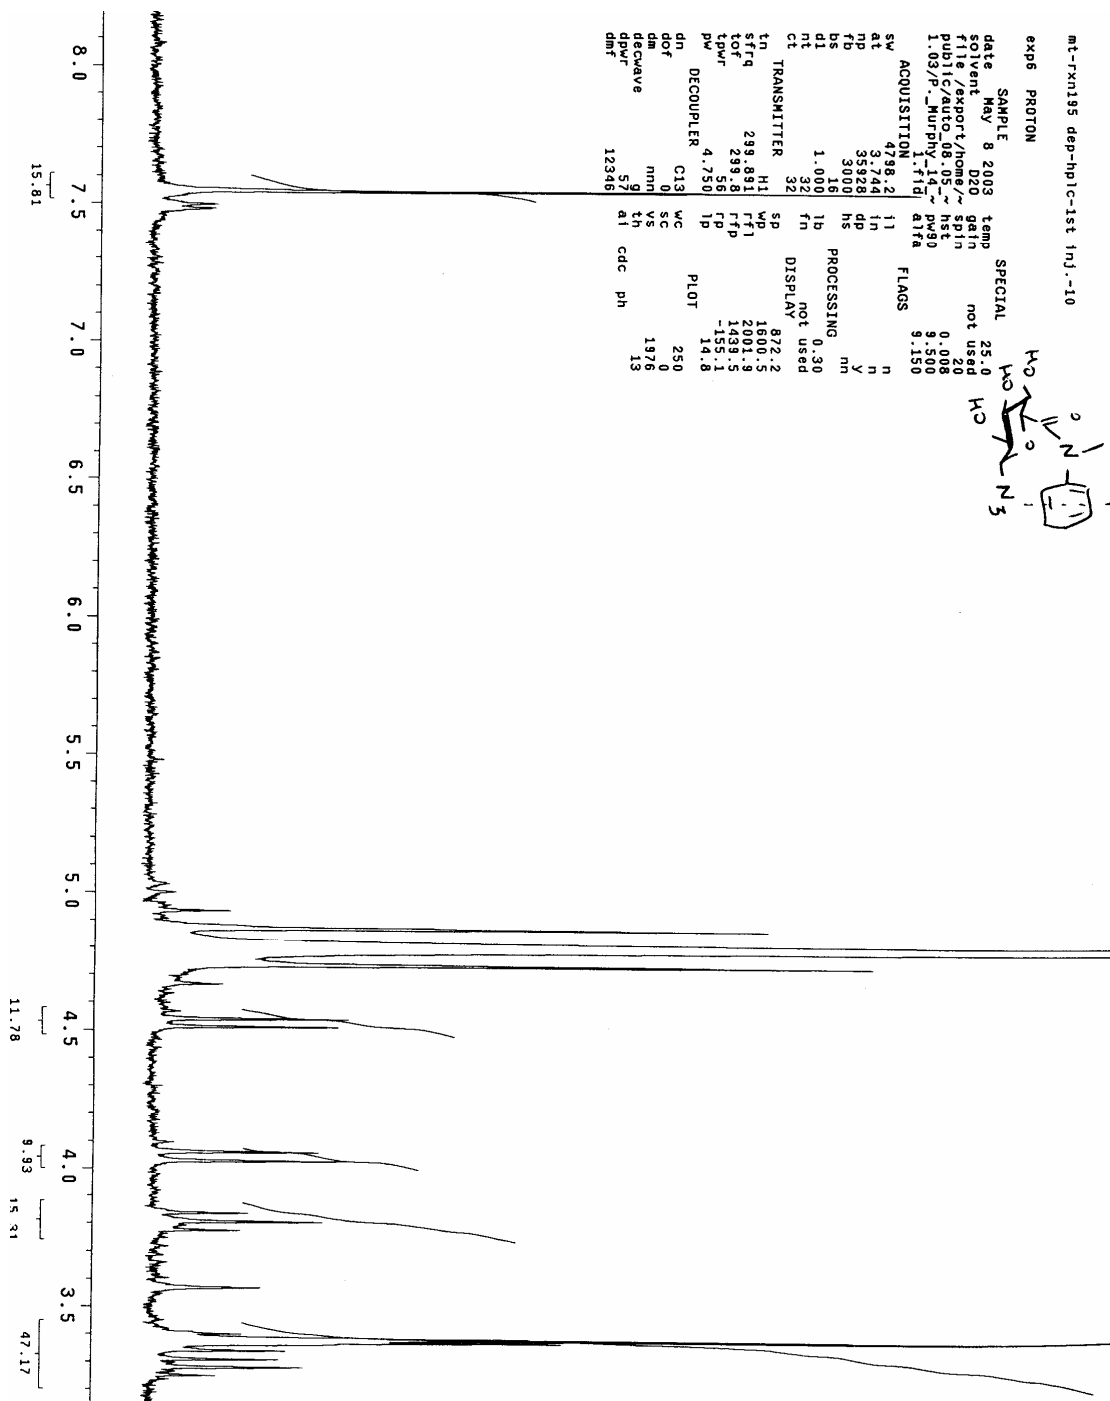

<sup>1</sup>H-NMR of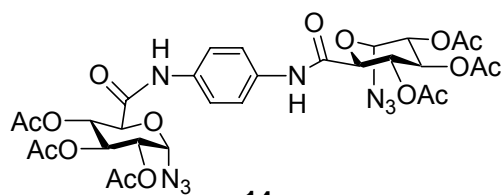

(includes 23% of **8**)

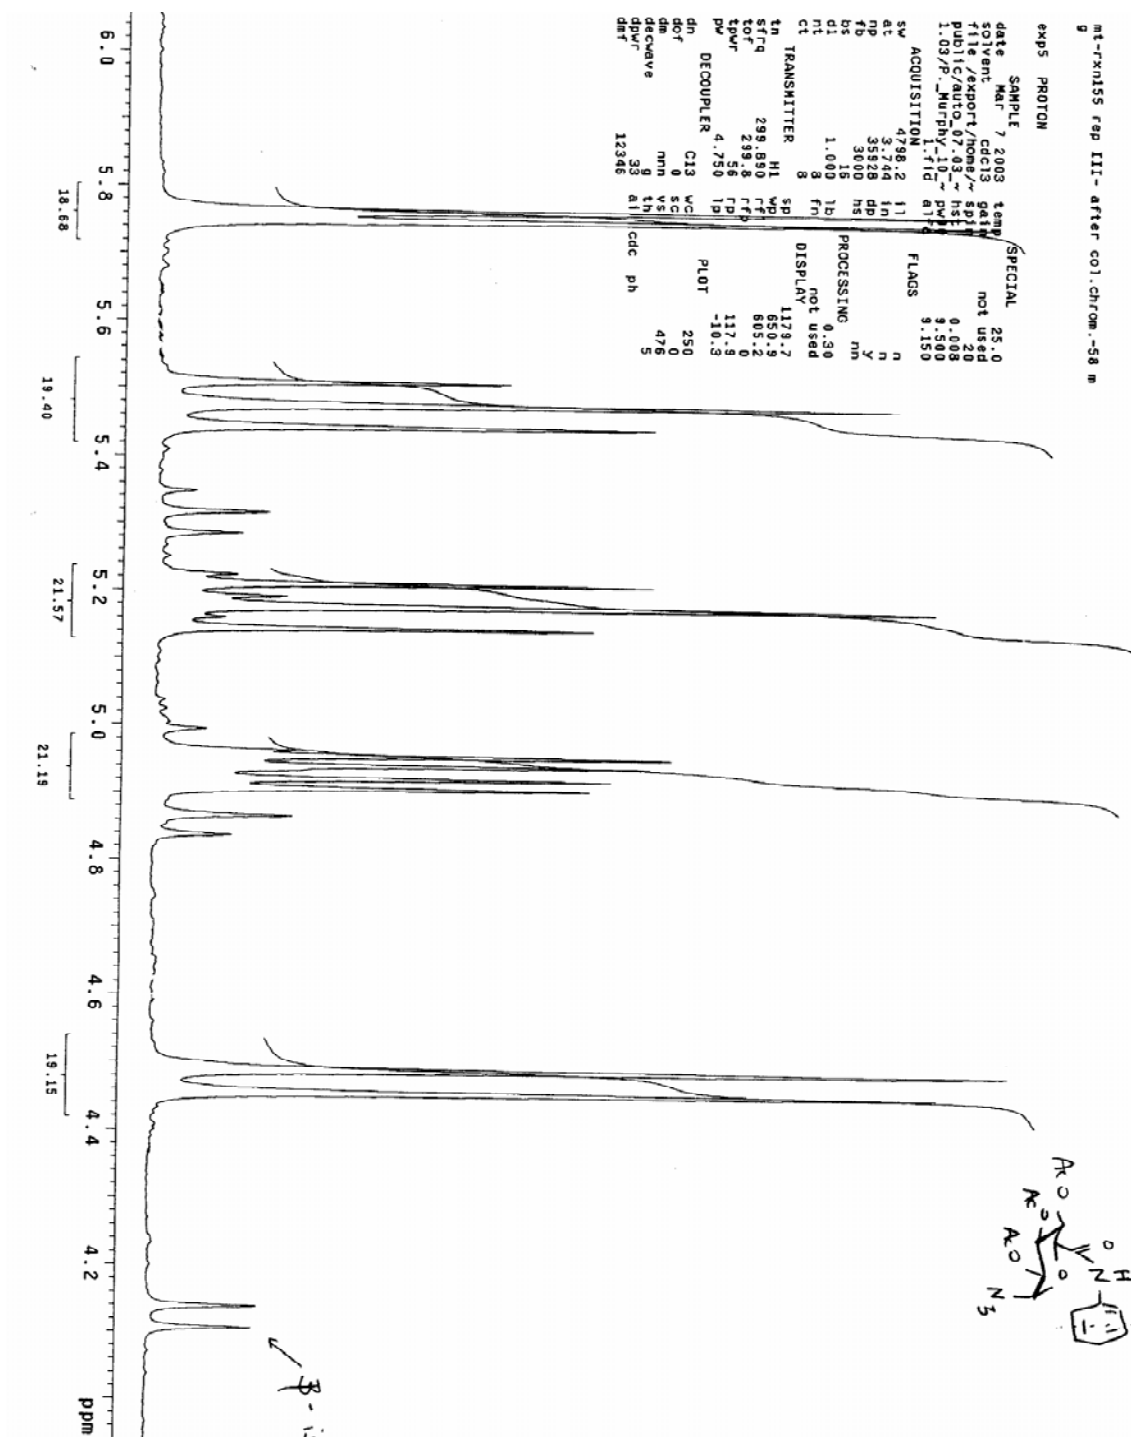

<sup>1</sup>H-NMR of
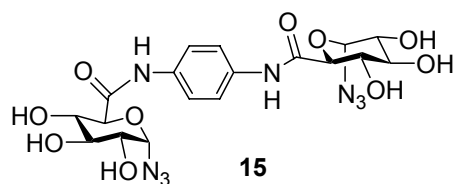

(contains 23% of 9)

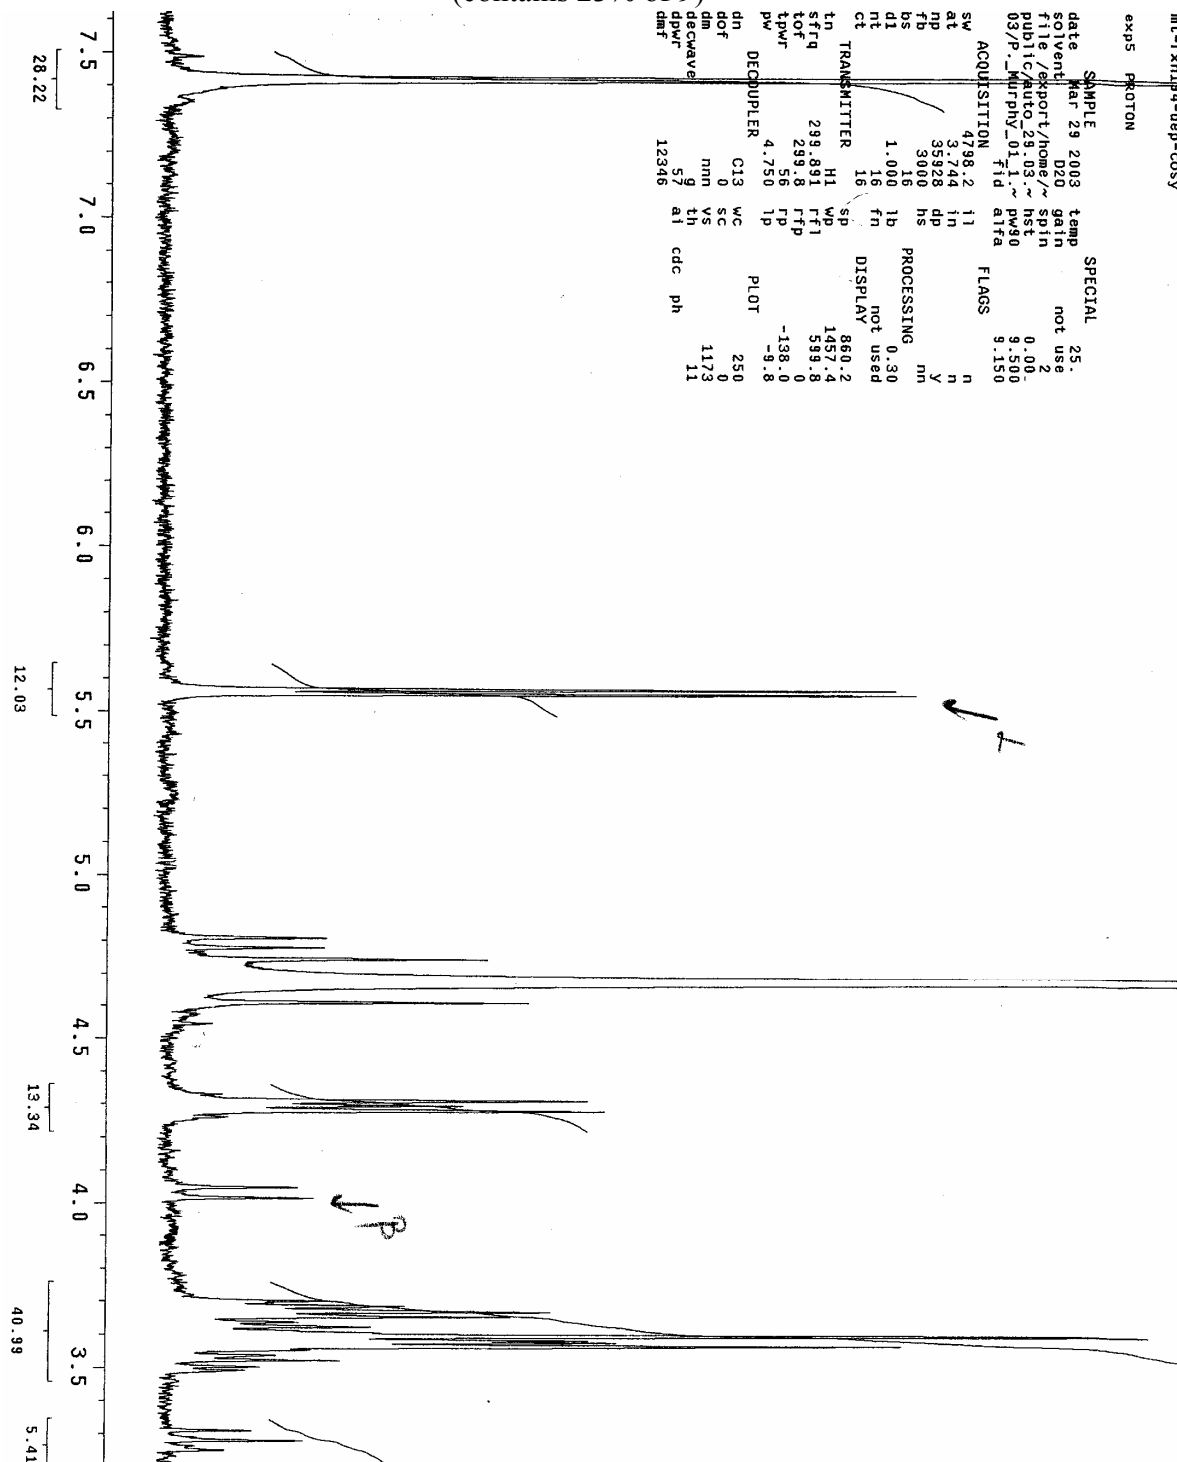

$^1\text{H-NMR}$  of

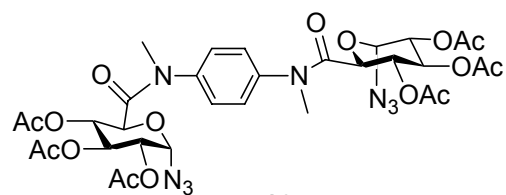

**16**

containing 23% of **10**

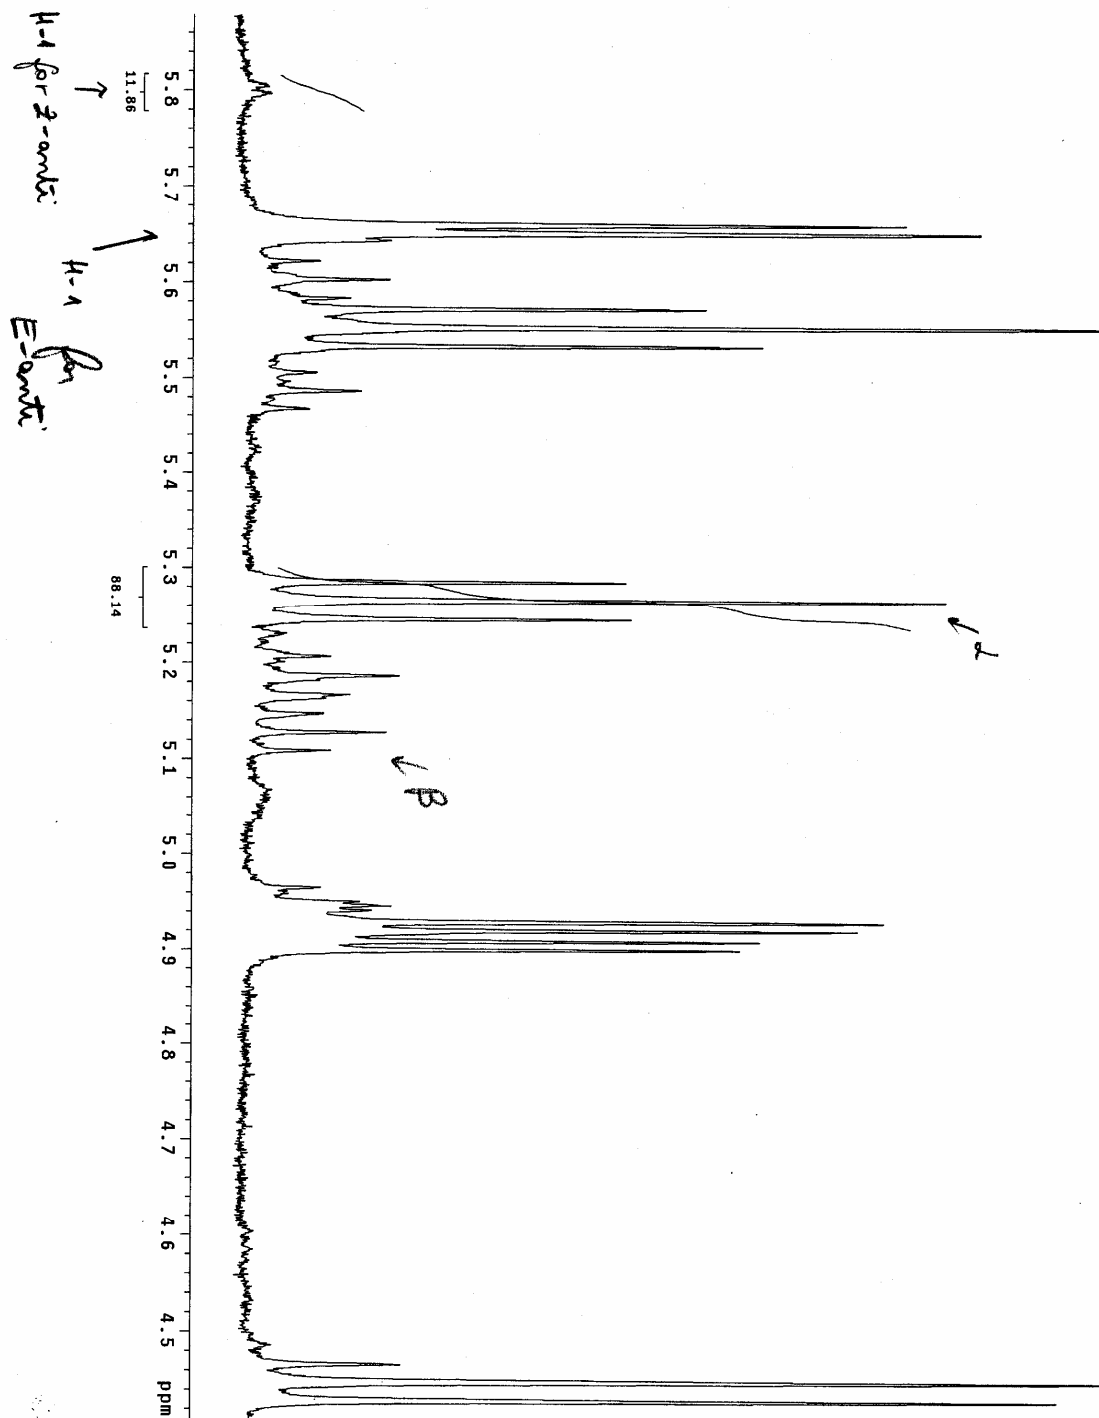





<sup>1</sup>H-NMR of

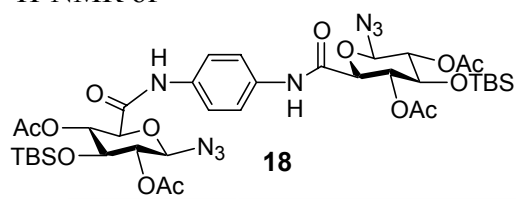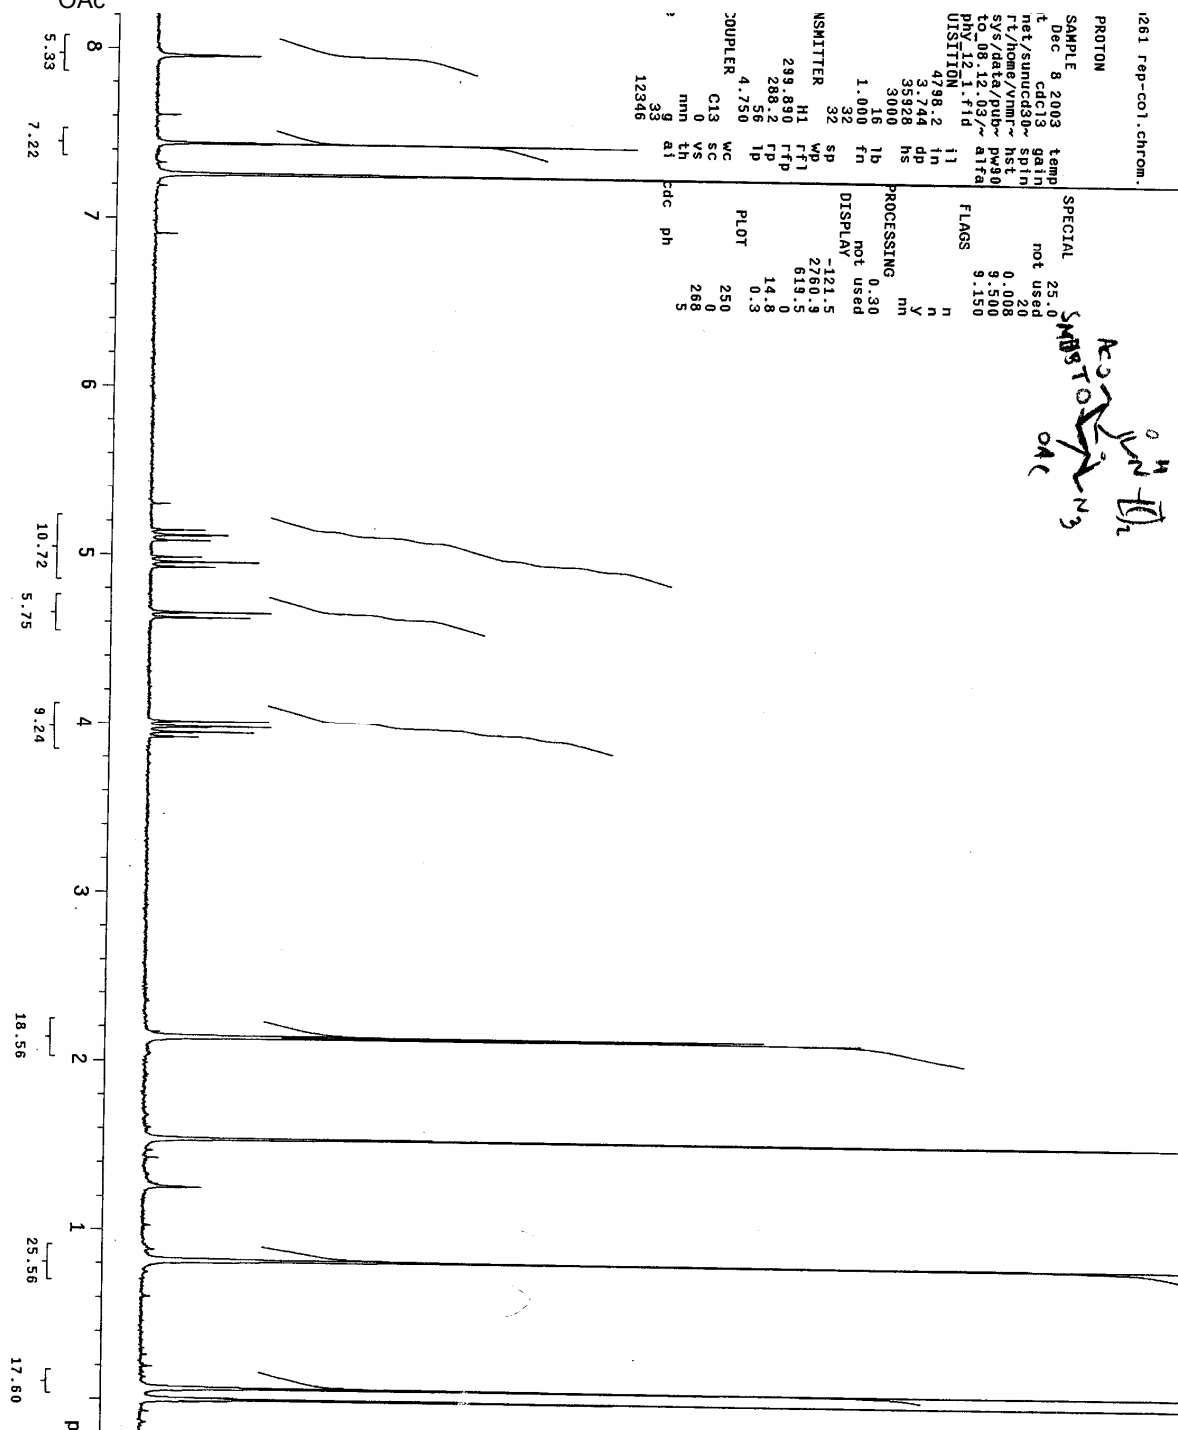

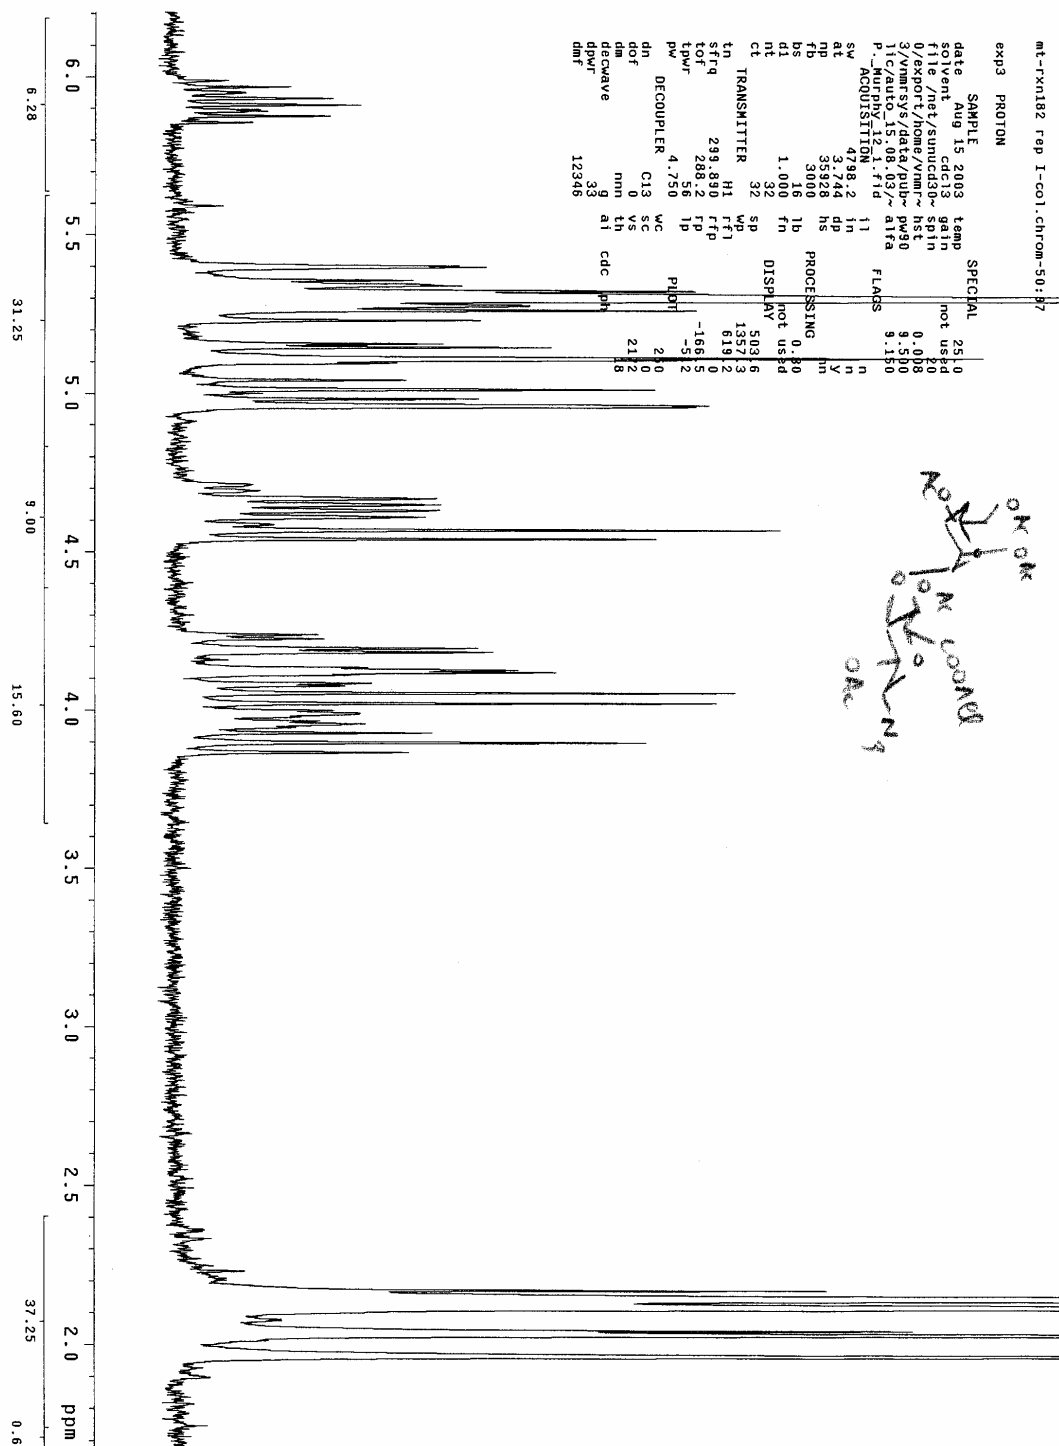

**<sup>1</sup>H-NMR of 25**
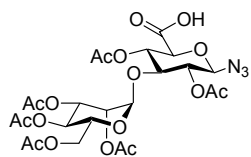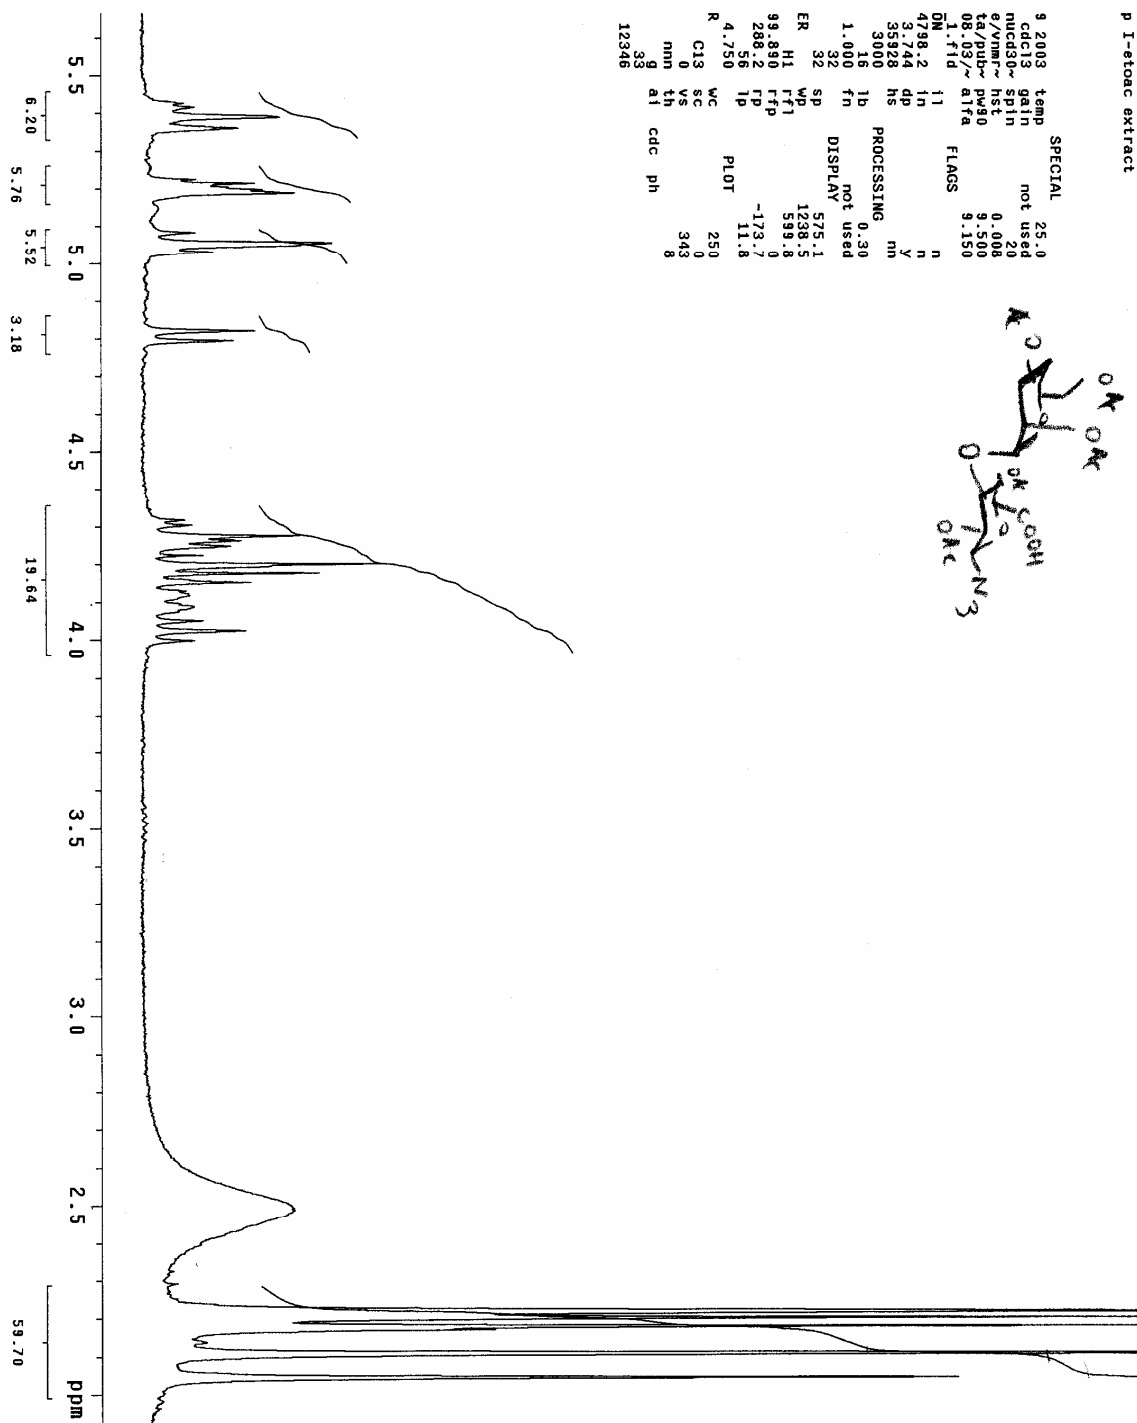

p I-etoac extract  
 SPECIAL  
 9 2003 temp 25.0  
 cdc13 gain not used  
 nucd30~ spin 20  
 e/vnmr~ hst 0.008  
 te/pdu~ pw50 9.500  
 08.05~ atfa 3.150  
 01.116  
 4798.2 in n  
 3.744 dp y  
 35928 hs m  
 3000  
 16 1b  
 1.000 fn not used  
 32  
 32 sp  
 575.1  
 1298.5  
 599.8  
 99.890 fti  
 208.2 ttp -173.7  
 208.2 ttp 11.8  
 4.750 tp  
 R  
 C13 250  
 0  
 mm th 343  
 g al cdc ph 8  
 33  
 12346

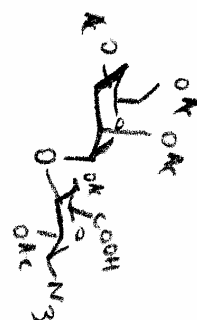

<sup>1</sup>H-NMR of

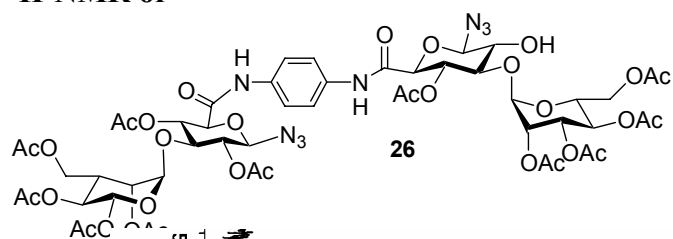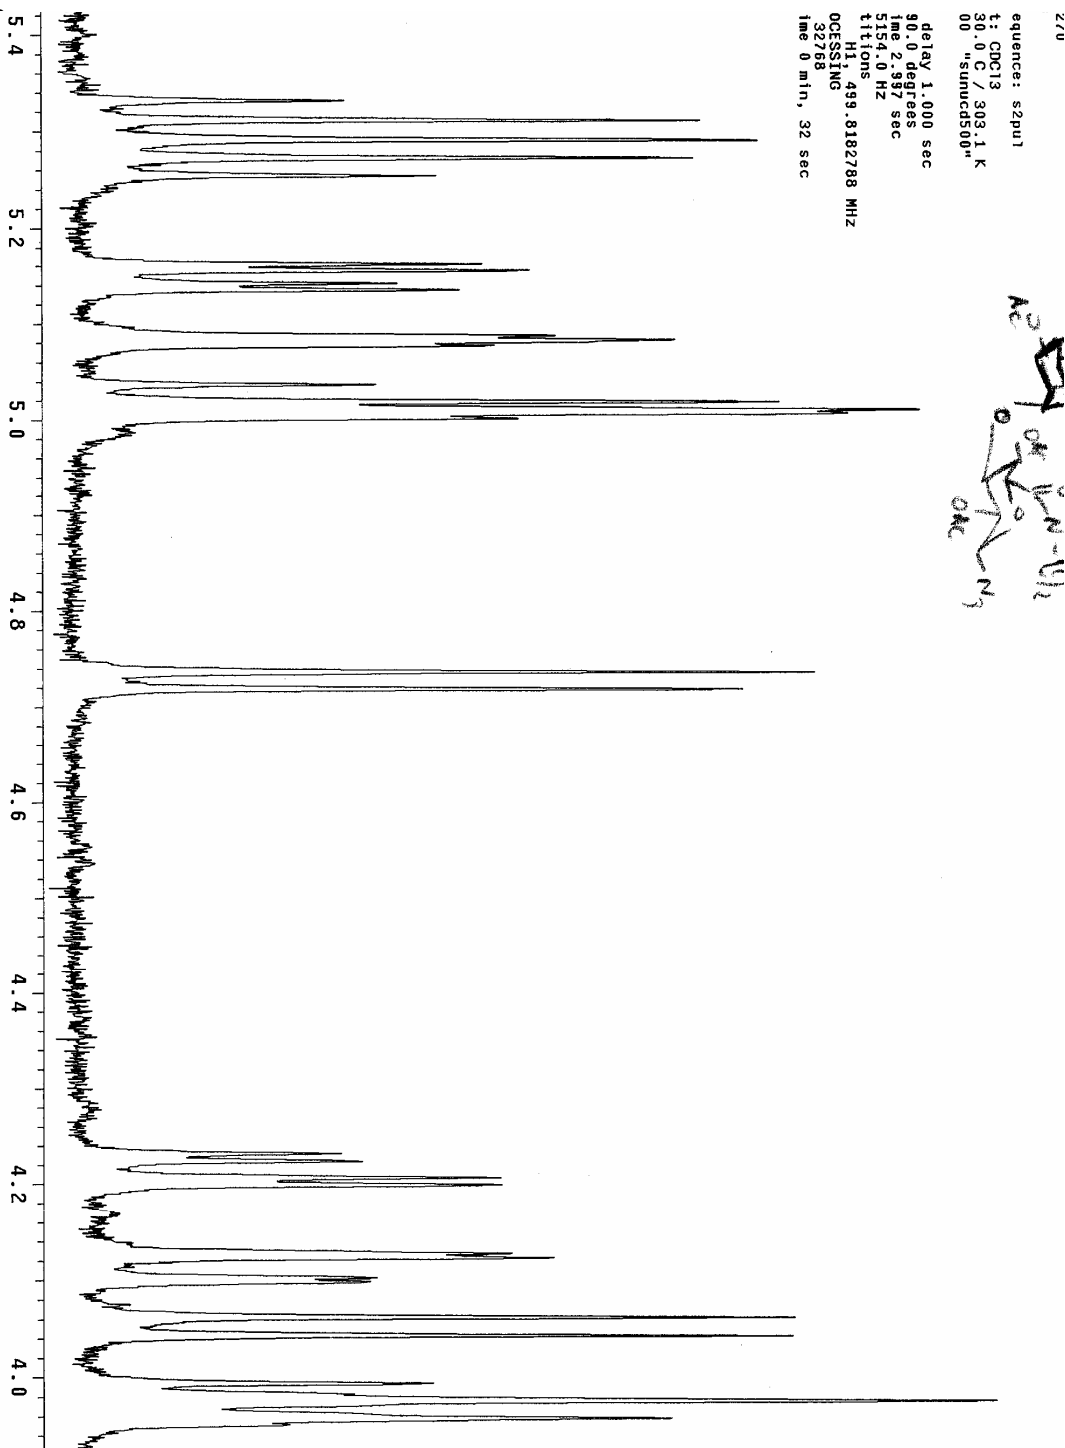

<sup>1</sup>H-NMR of 6

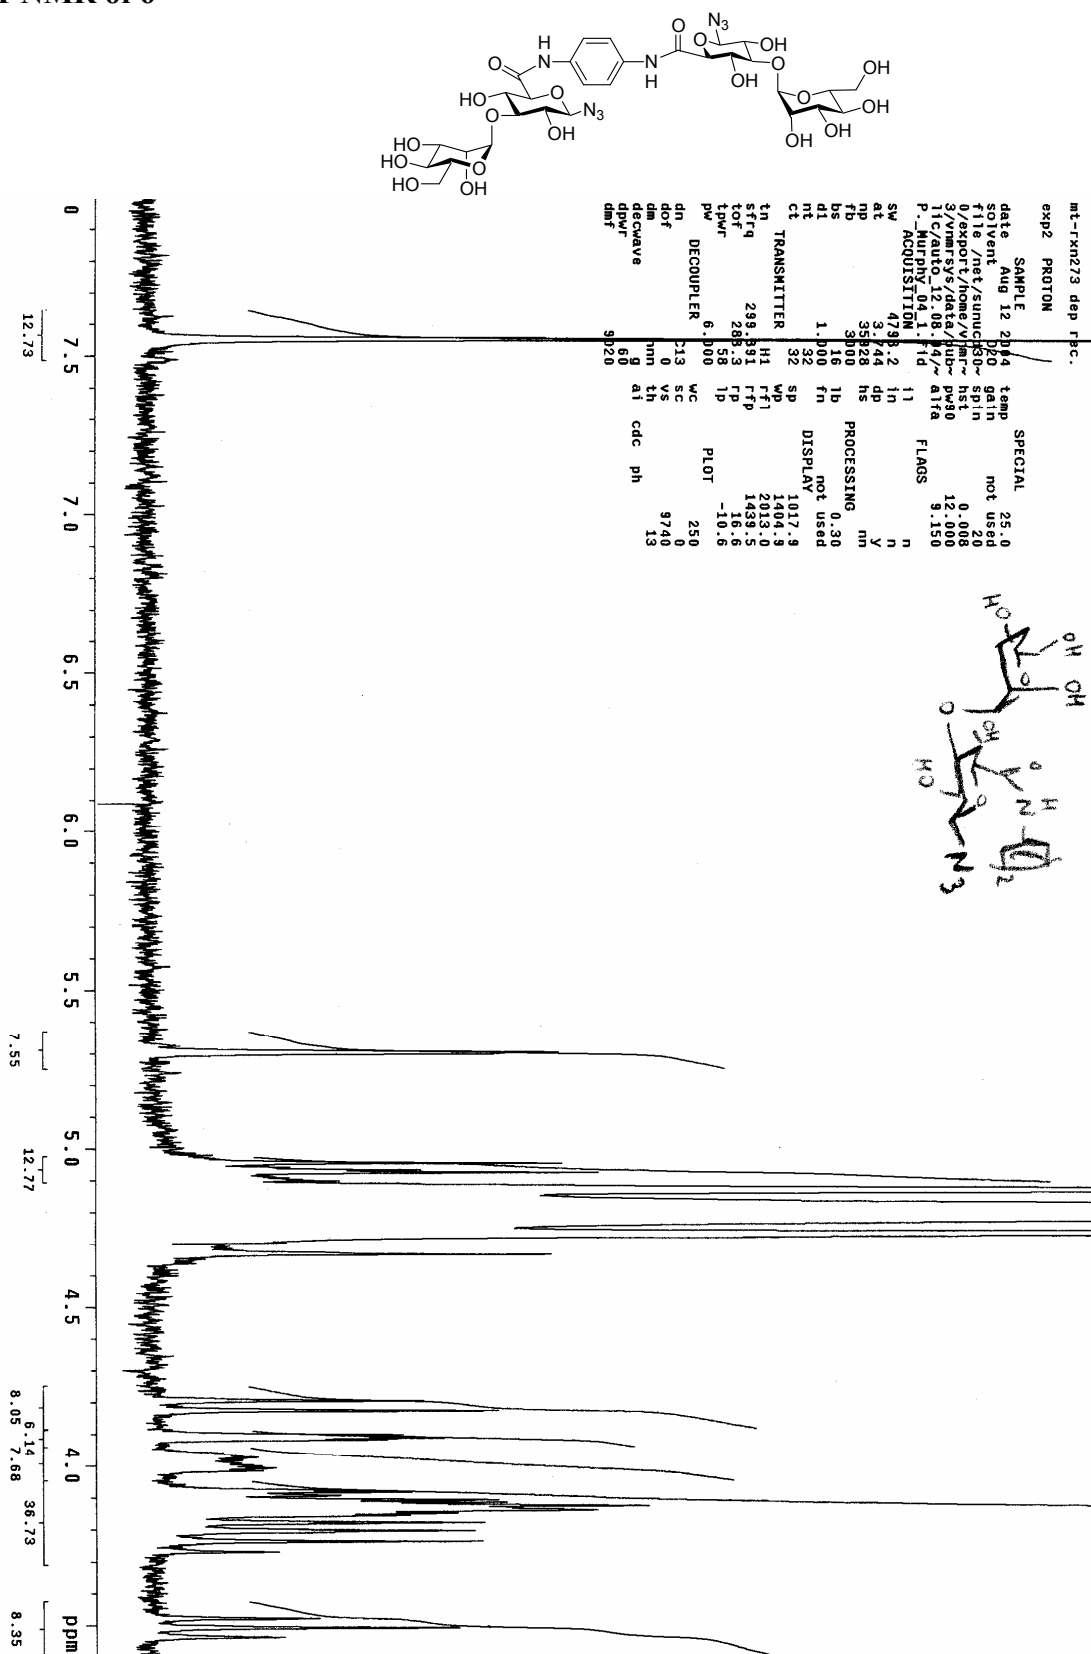

Variable temperature study for **11** (5-70 °C)

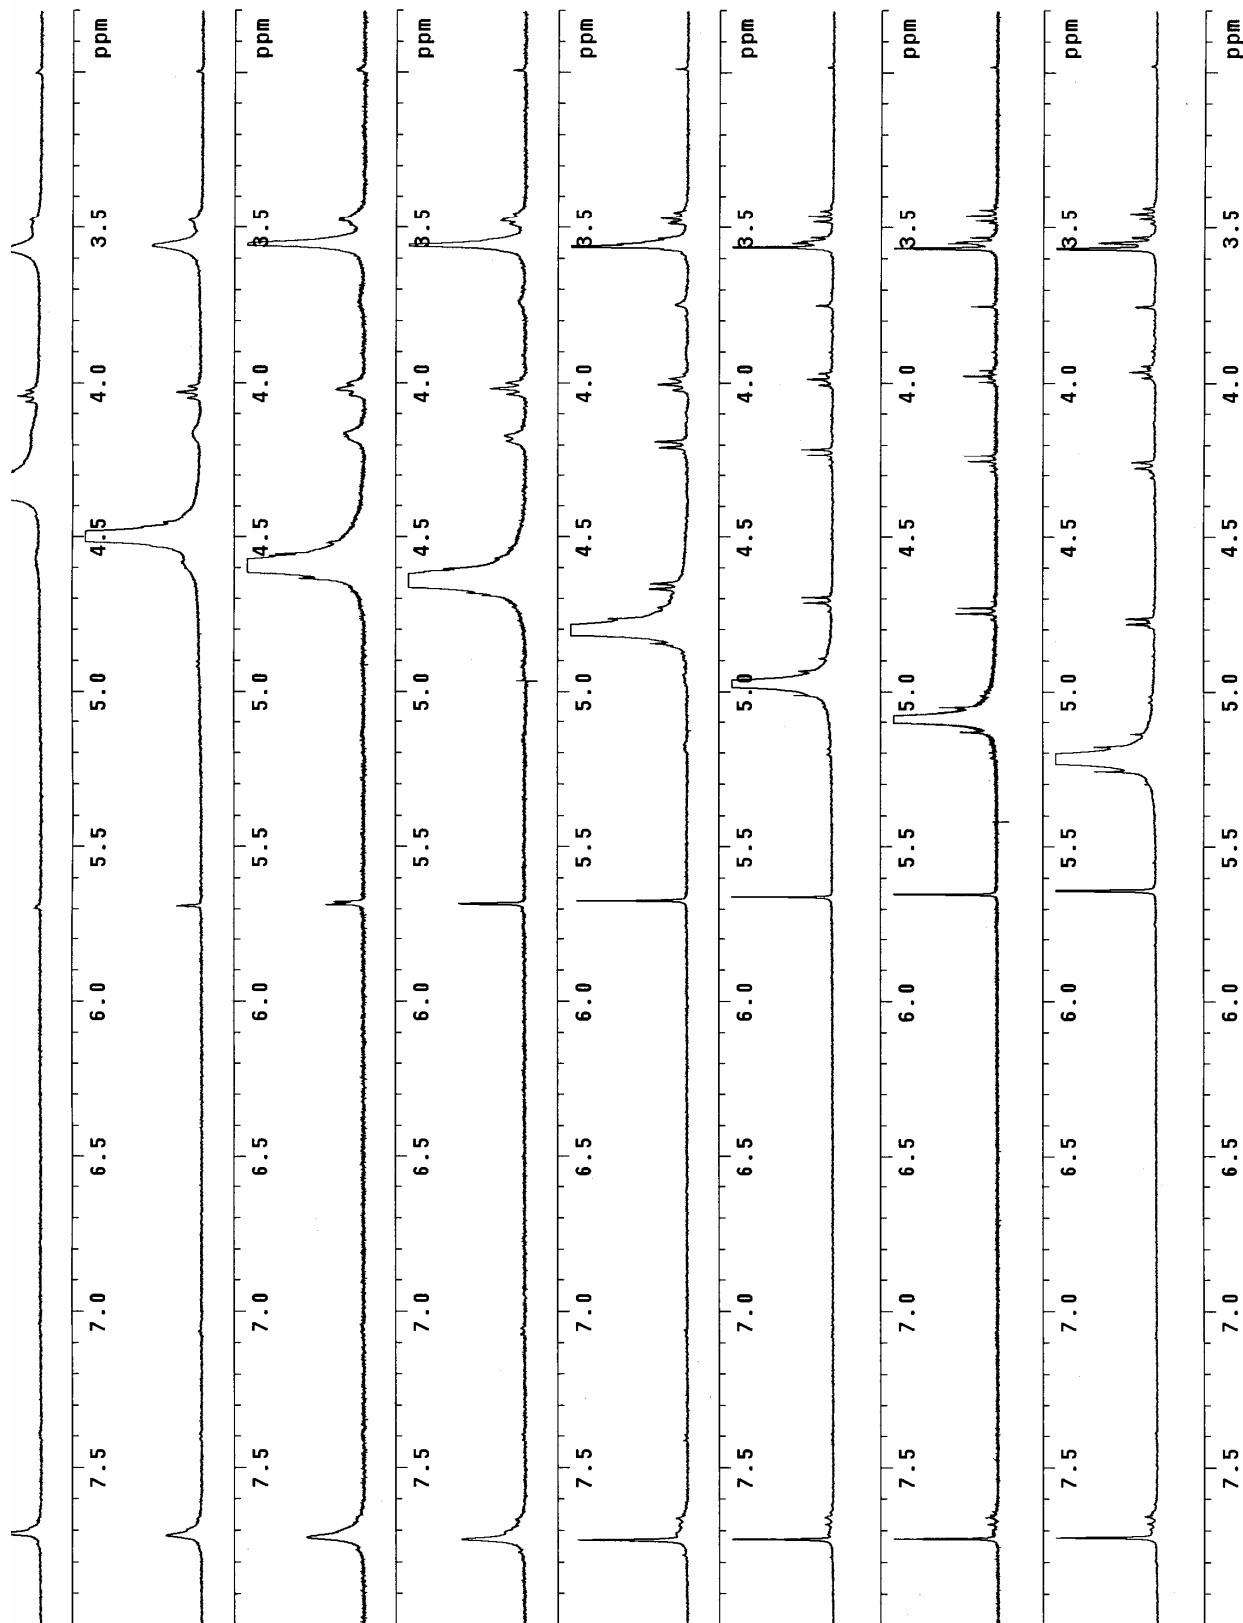

Variable temperature study for **17** (5-70 °C)

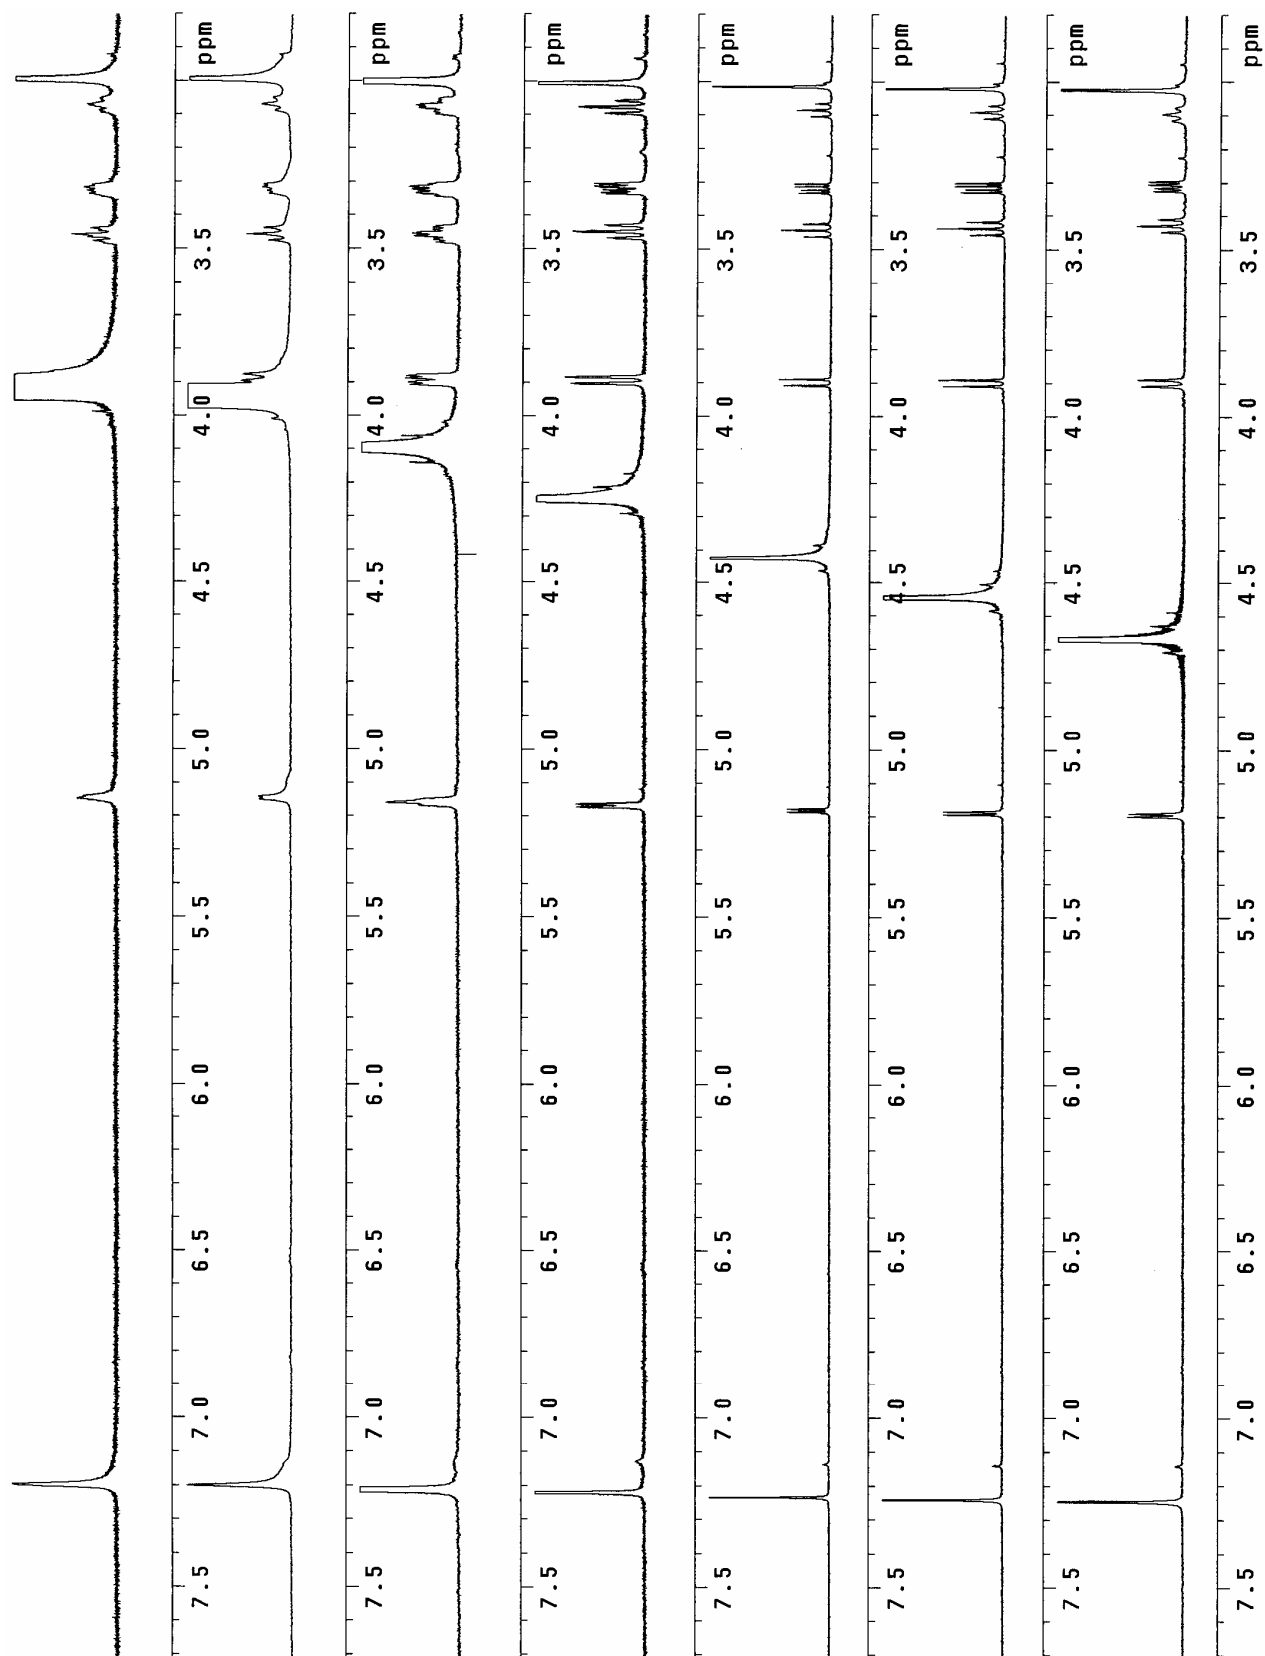



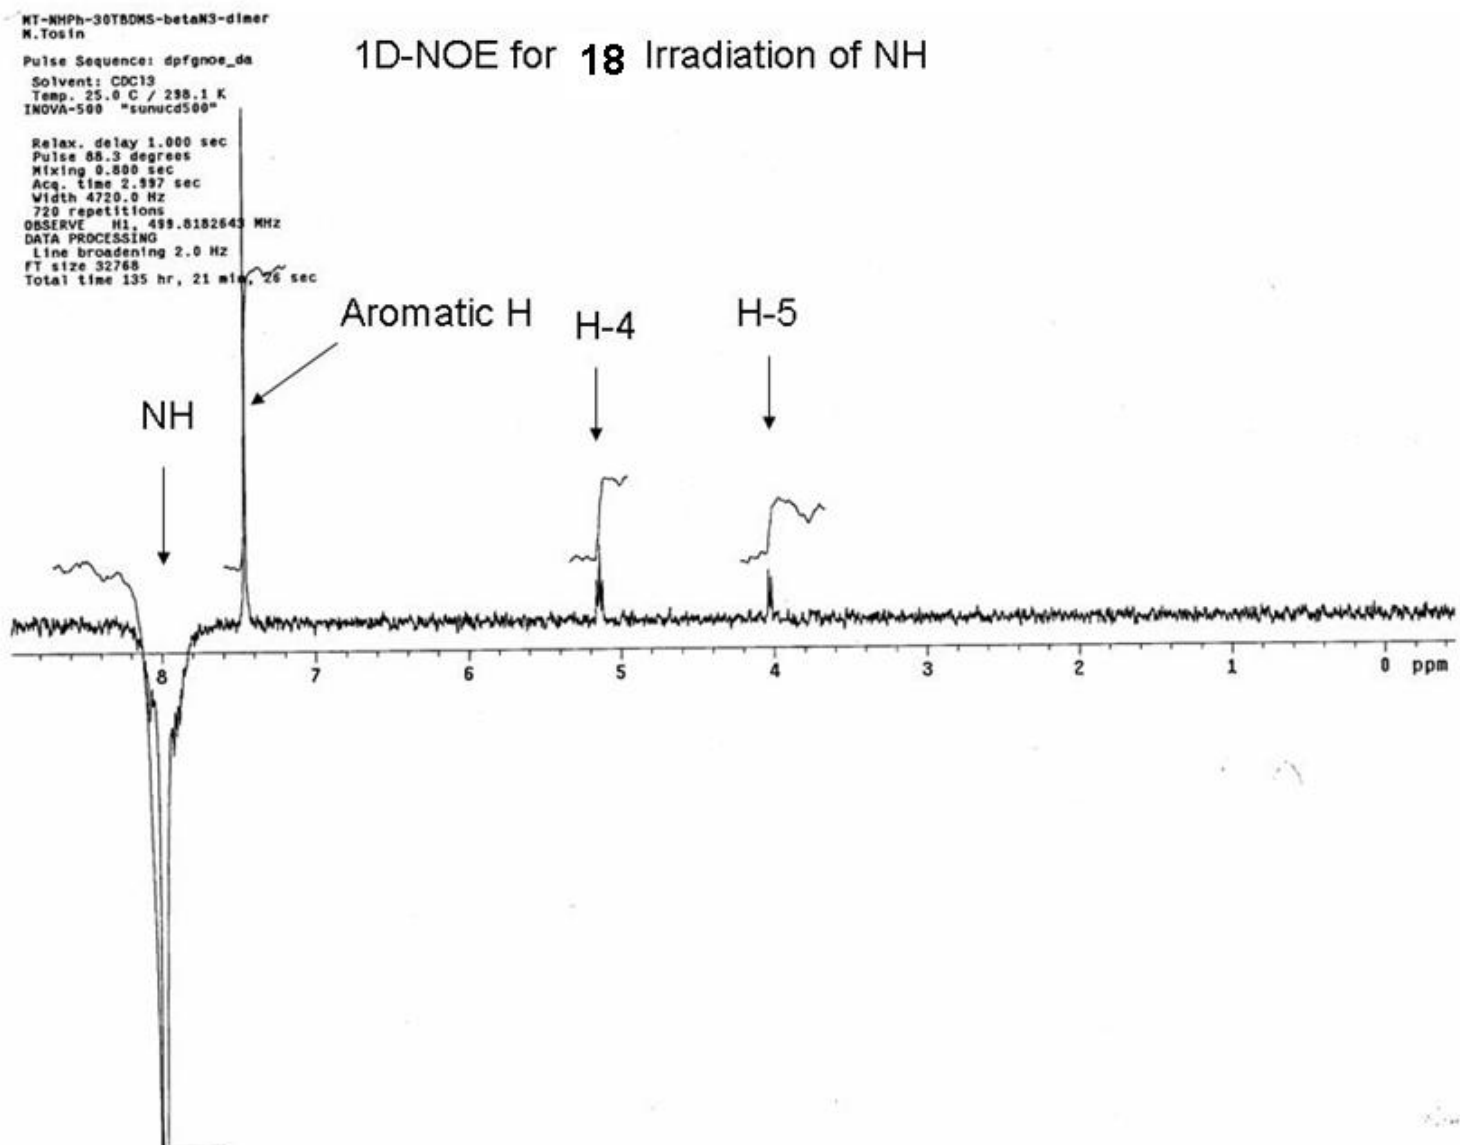

2D ROESY of **17**

$\tau_m = 0.4$  s

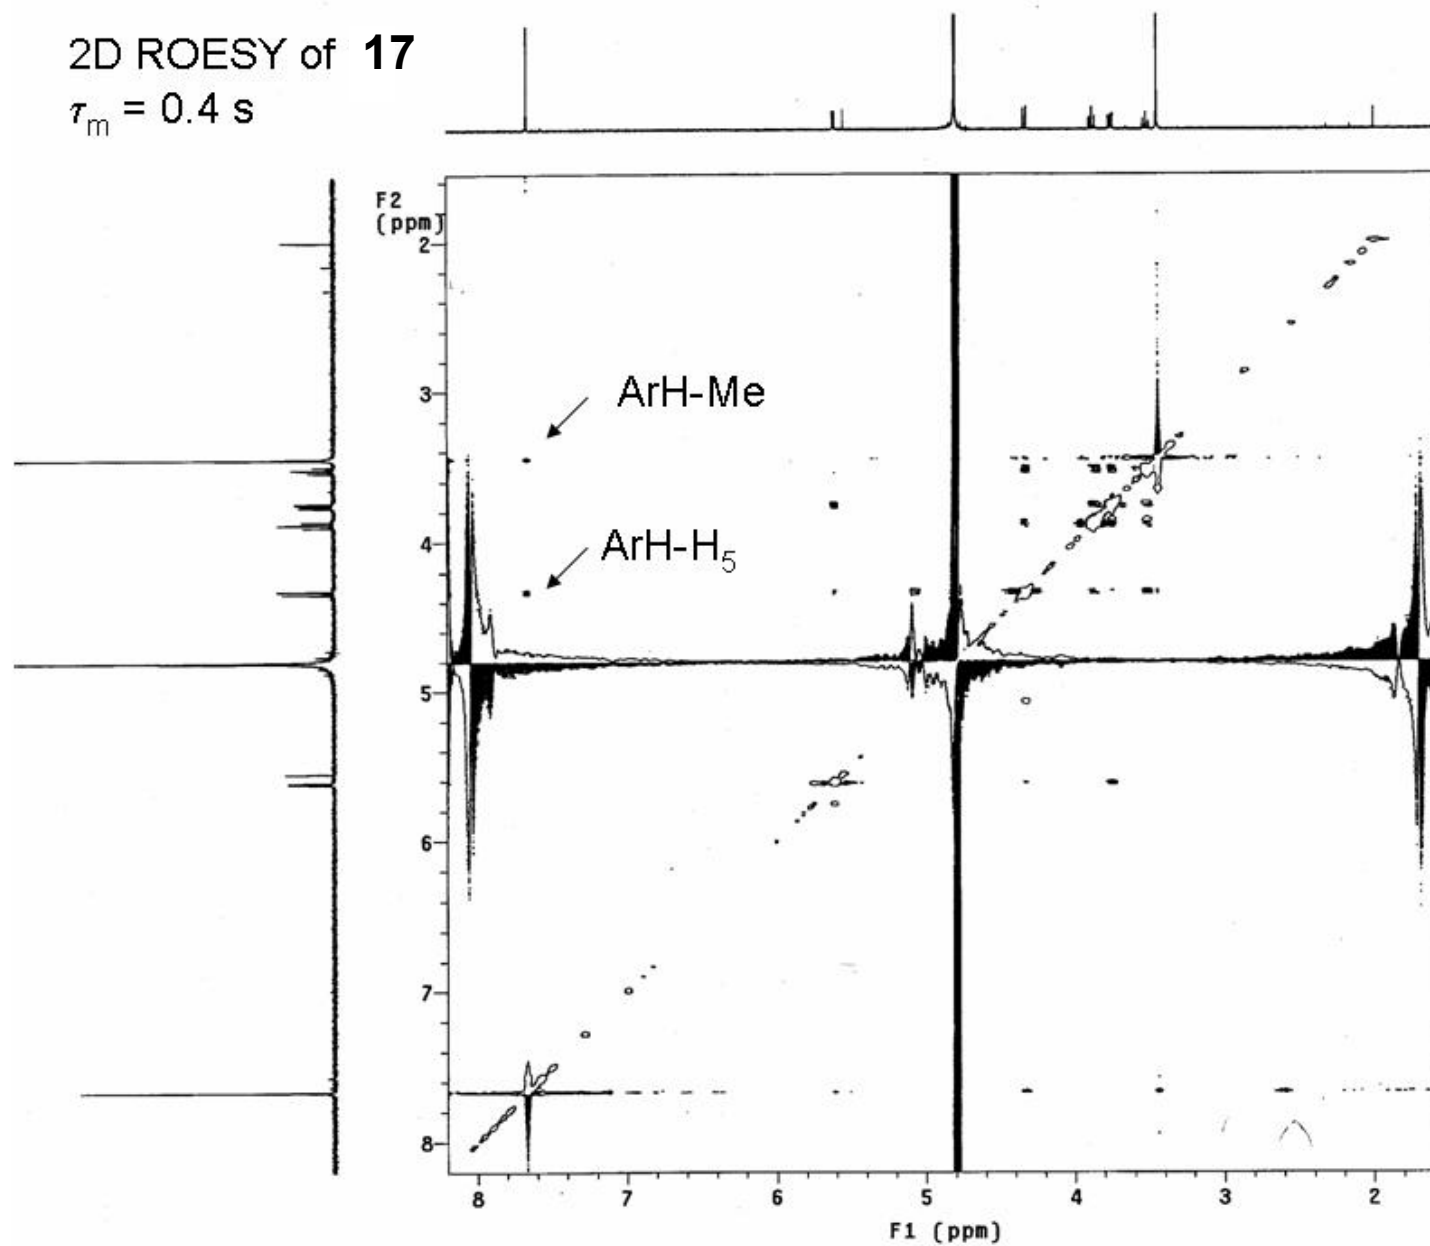

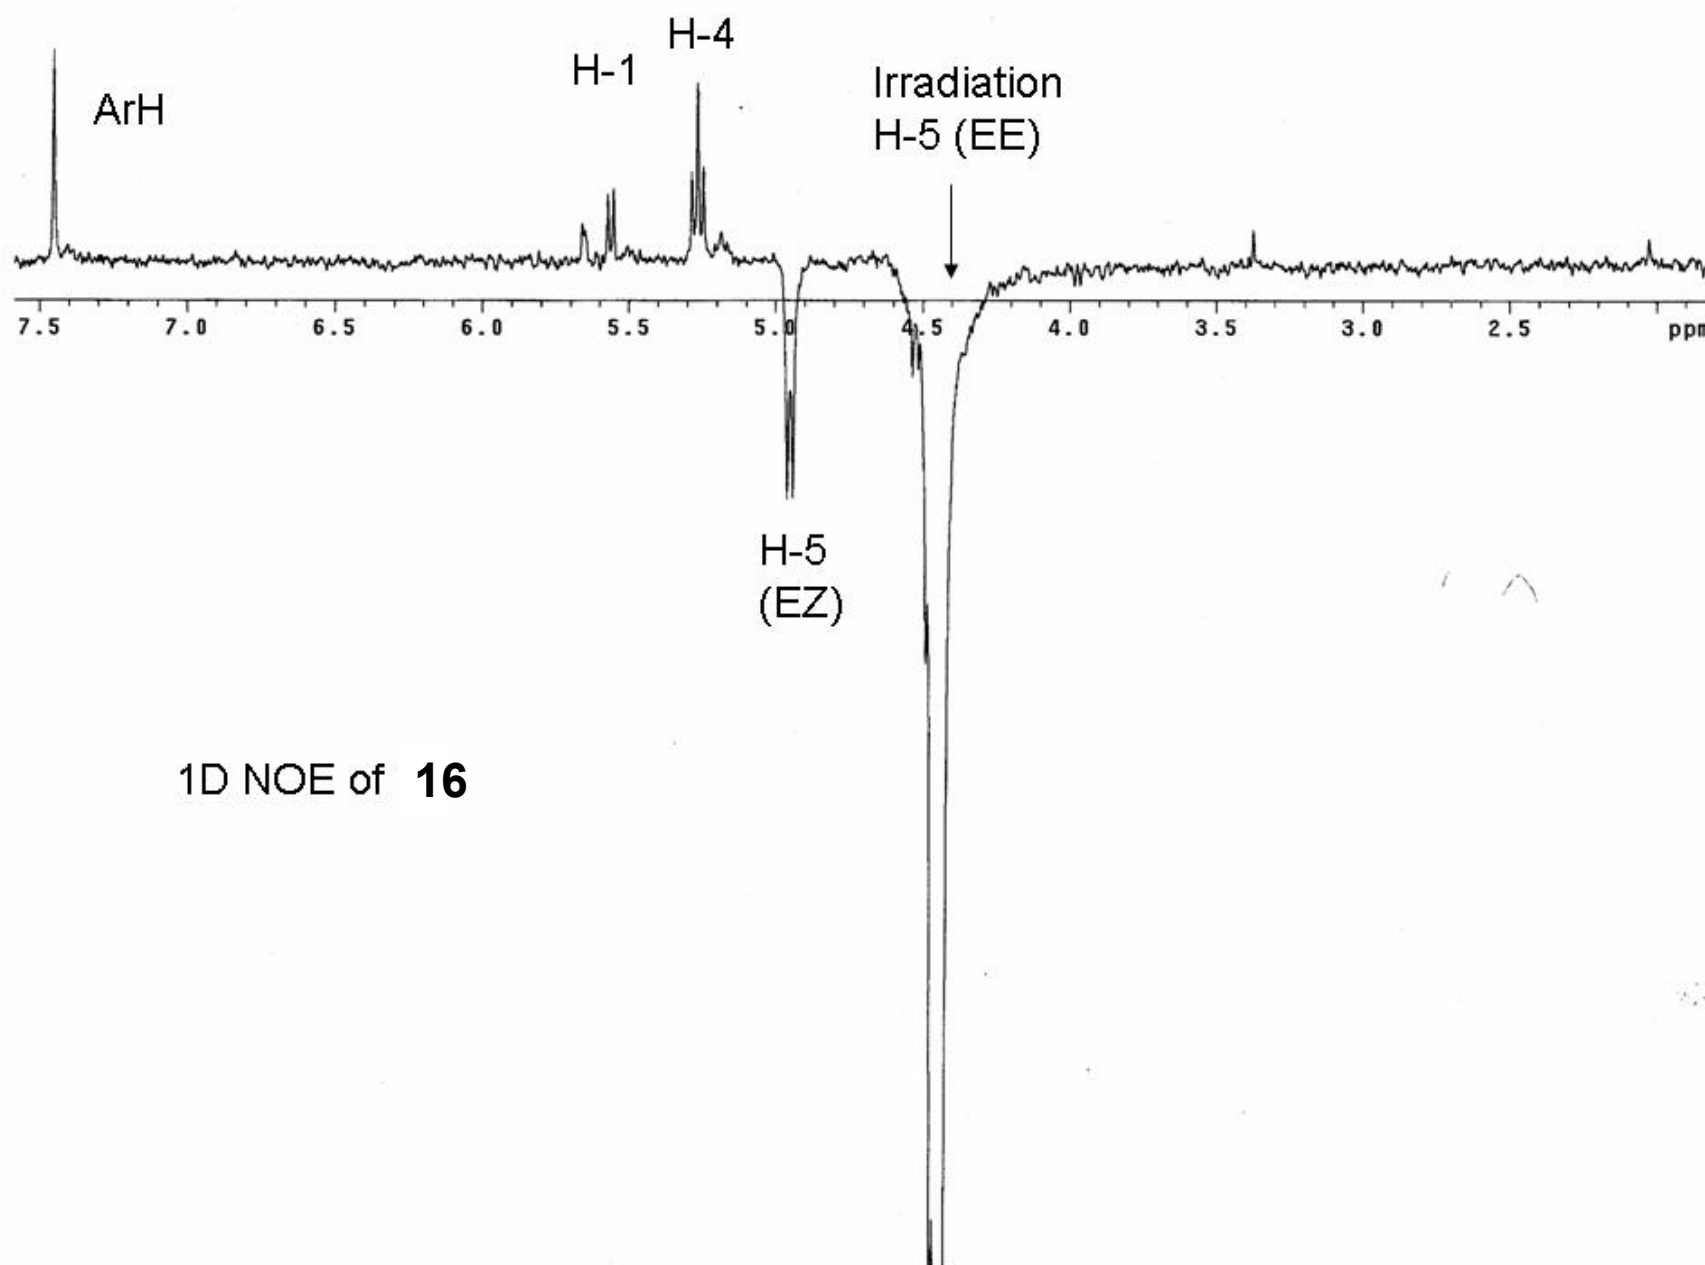

1D NOE of **16**

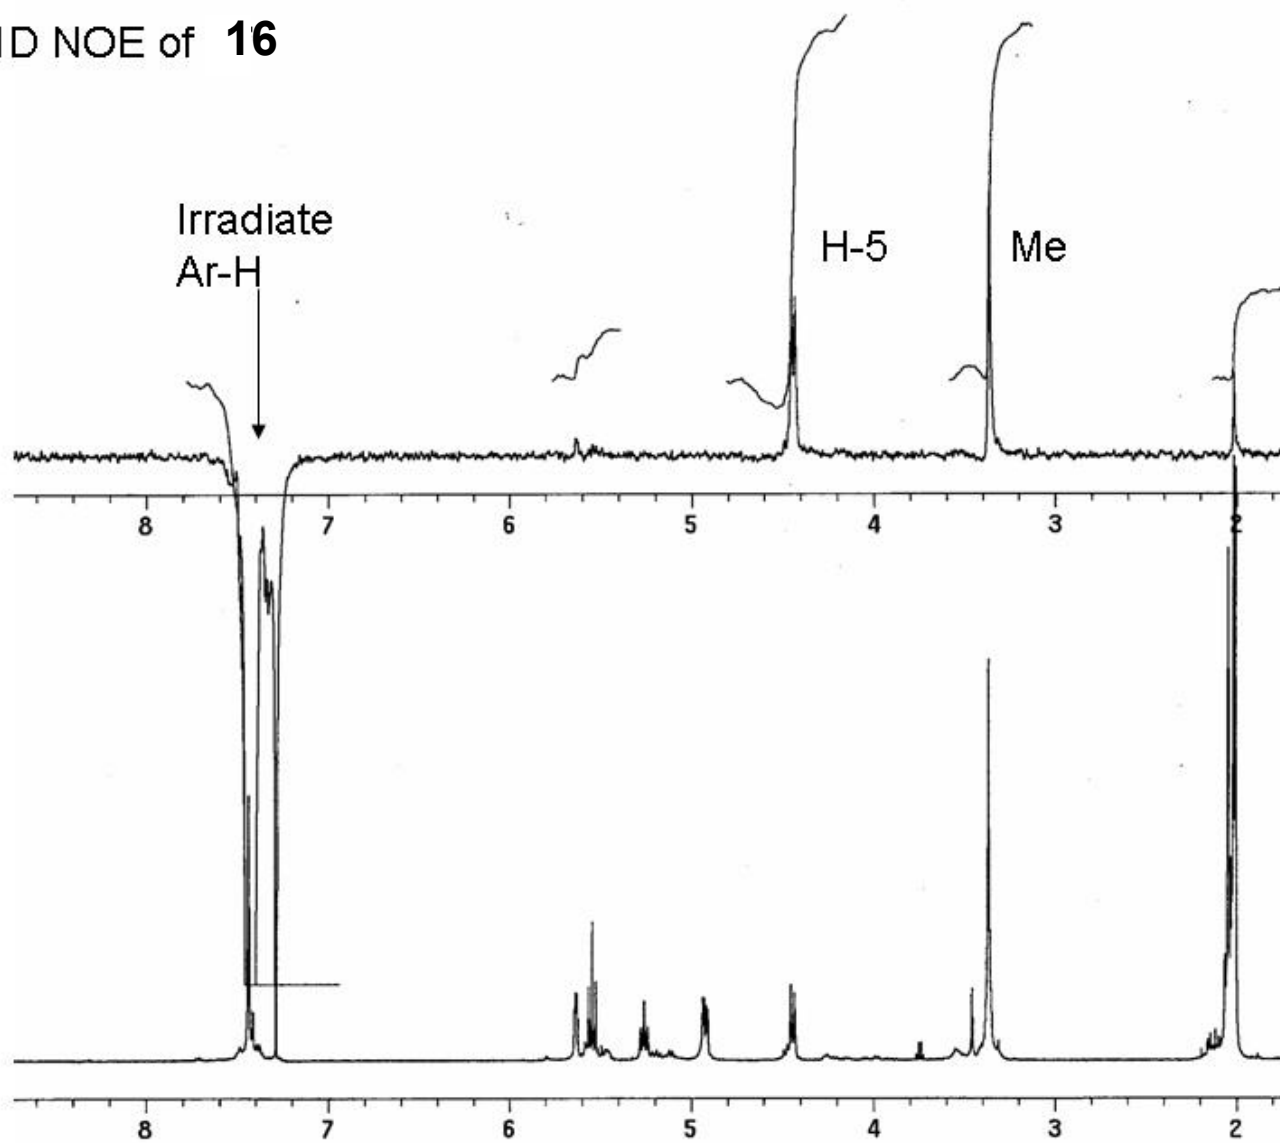

## 2D ROESY of **26**

Troesy\_da

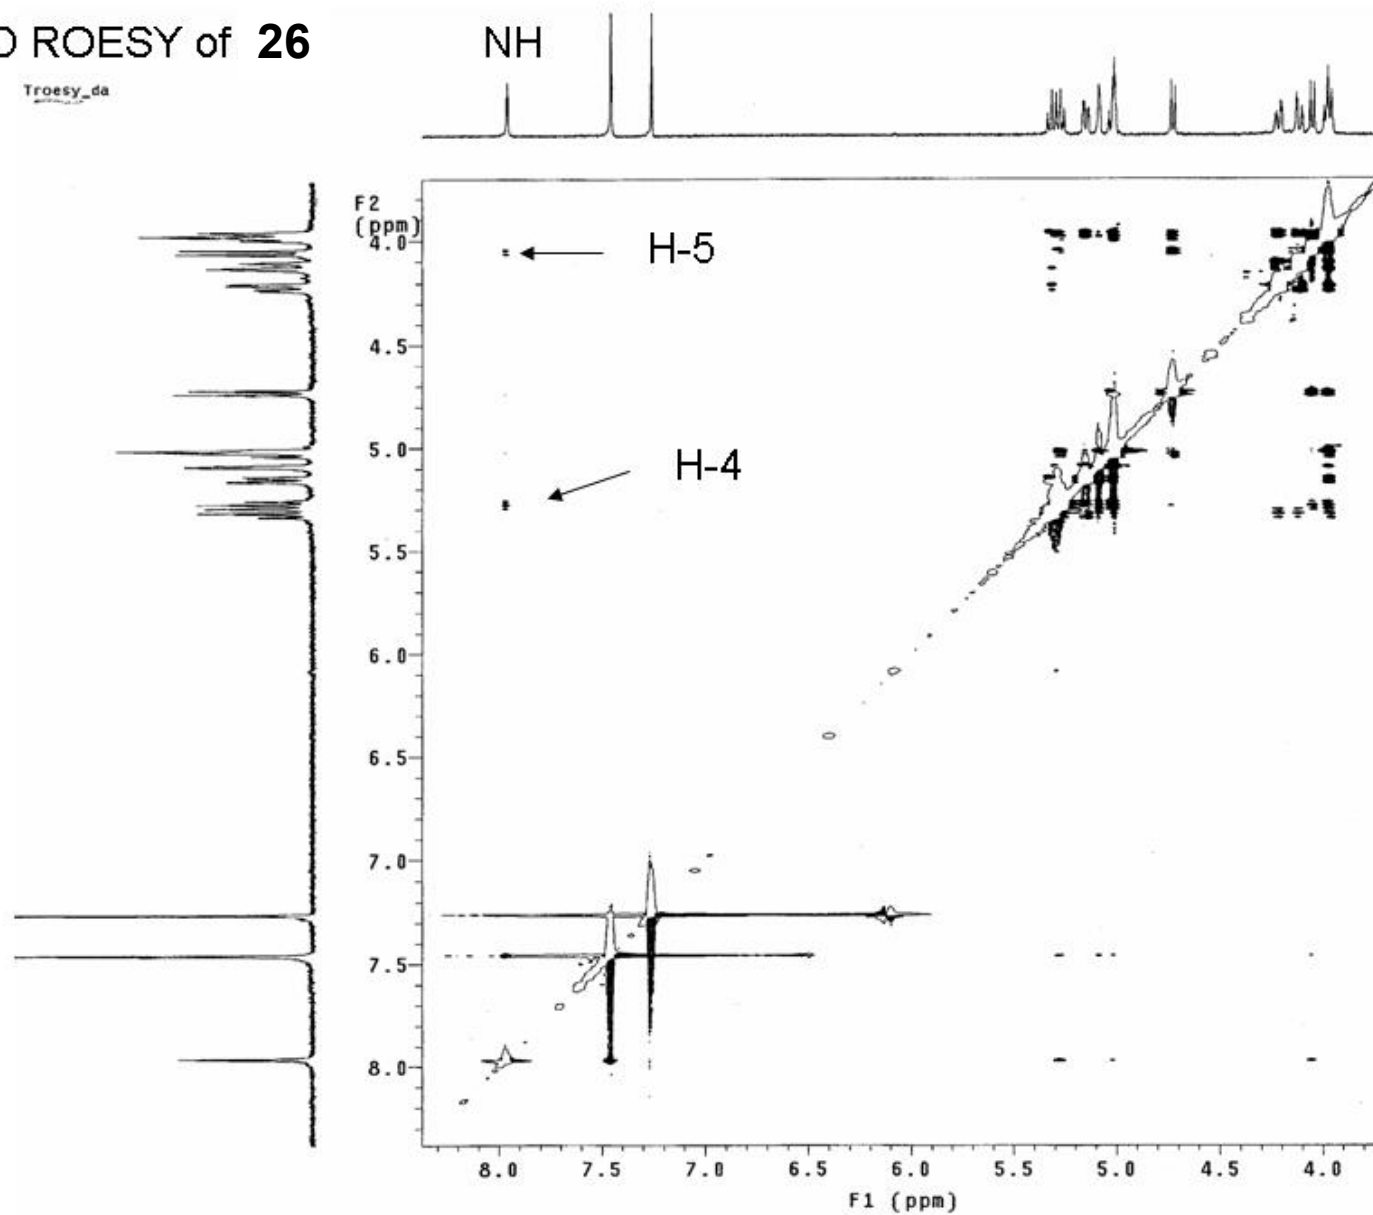

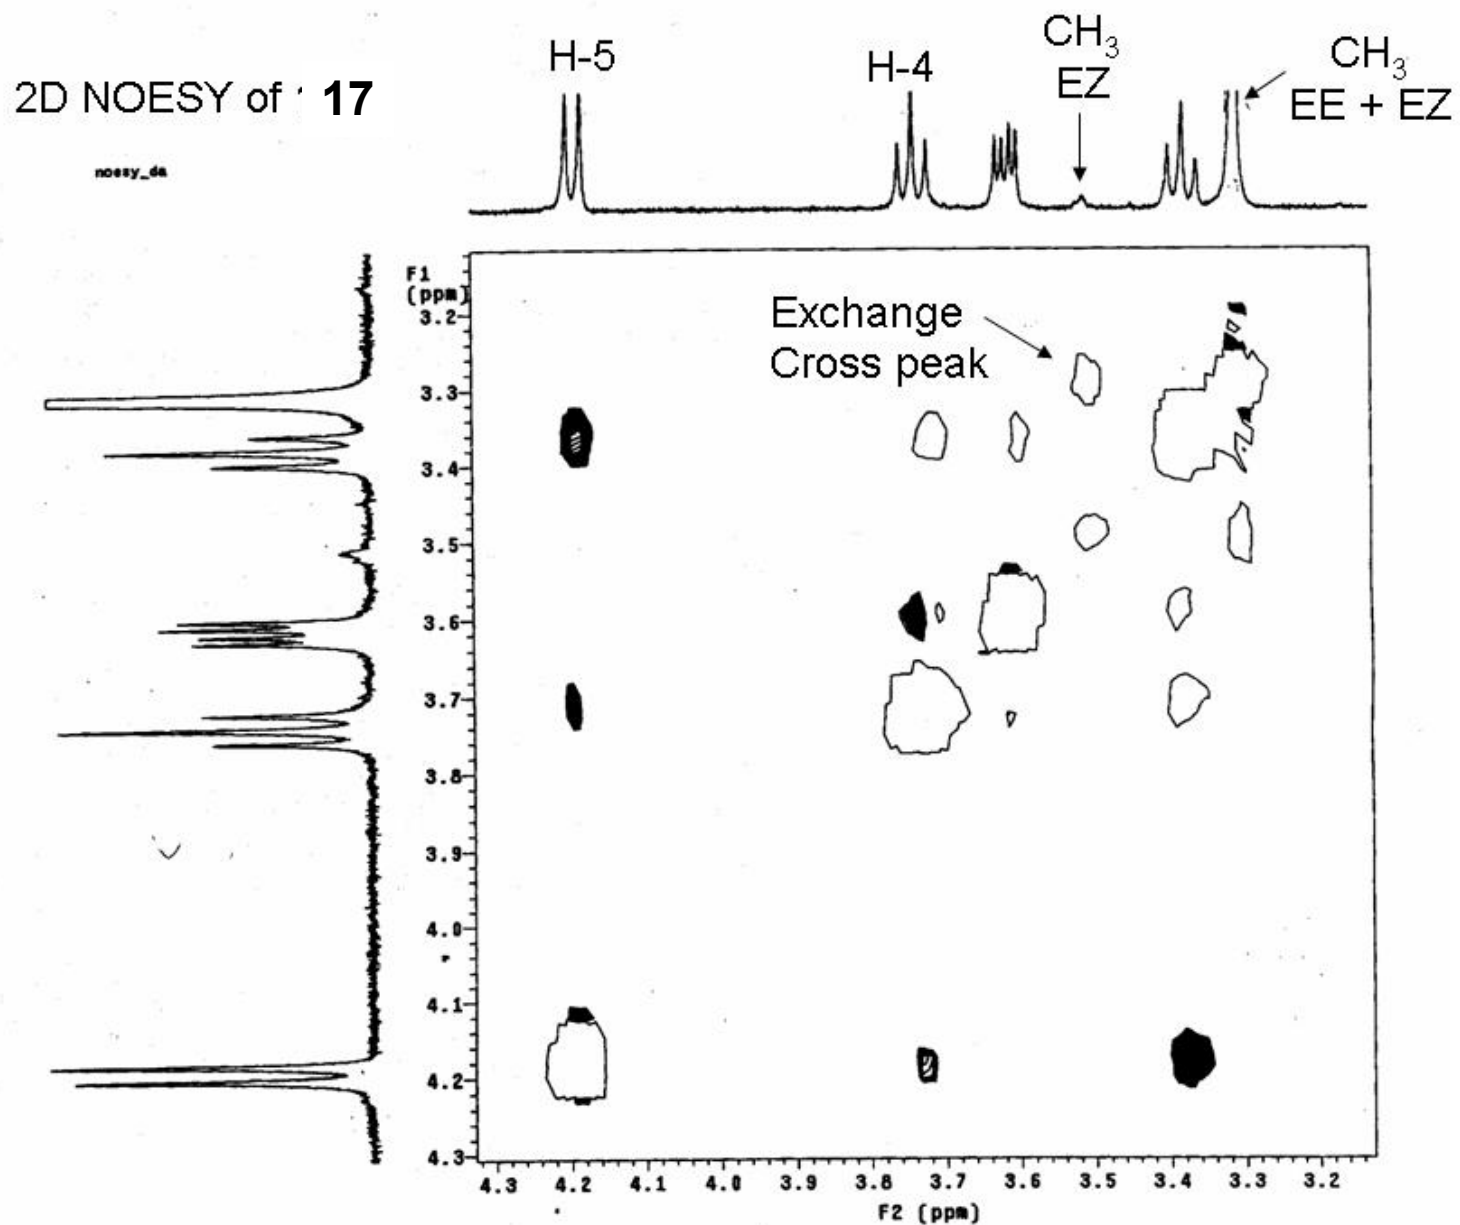

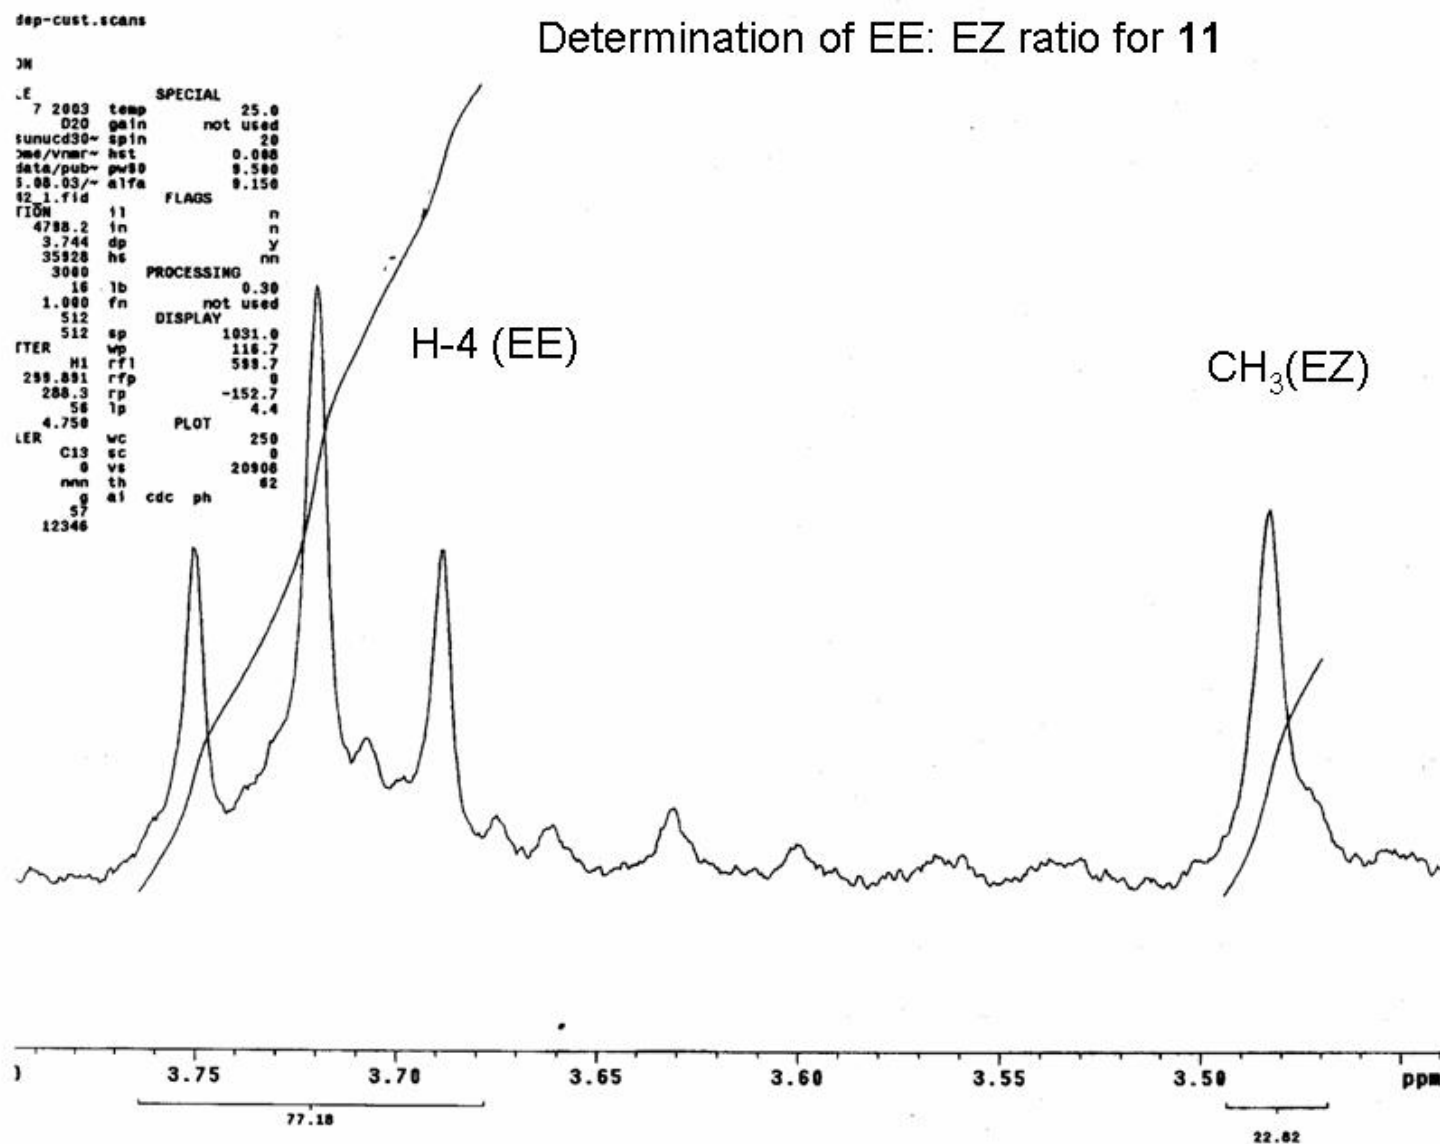

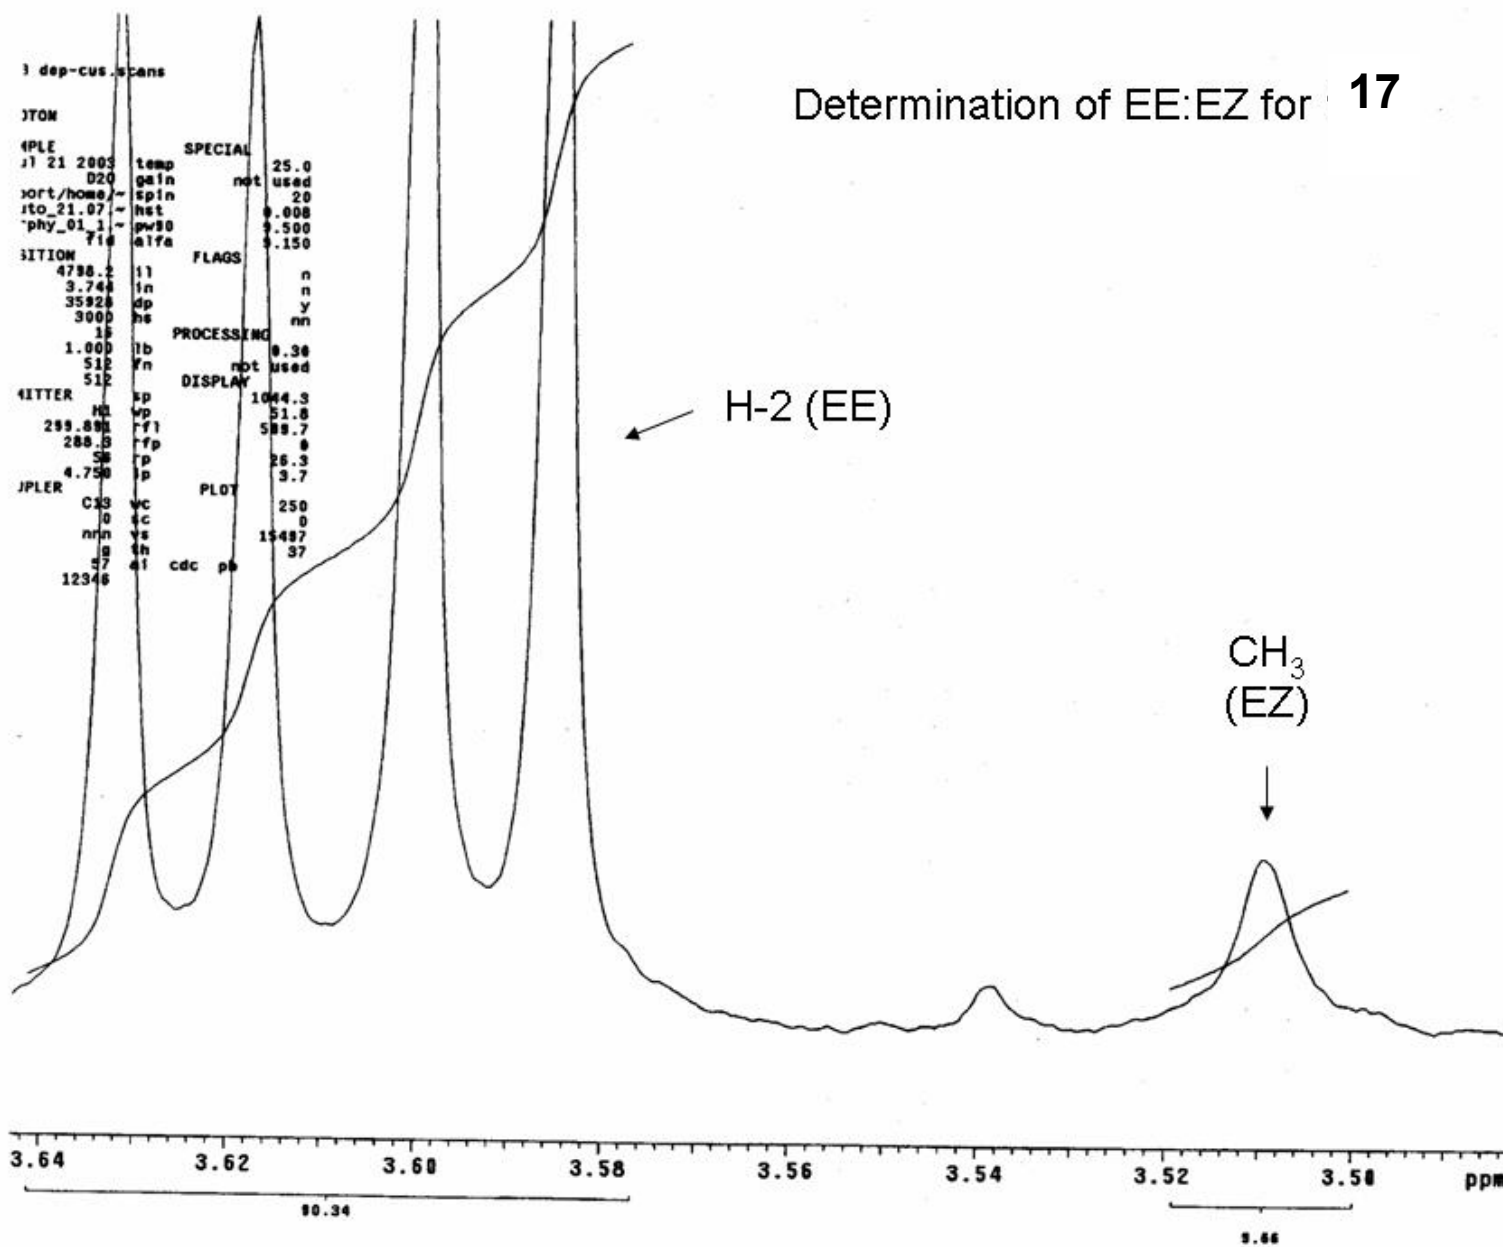



## 2D NOESY 9

Recorded in  
 $D_2O:H_2O$   
(10:90)

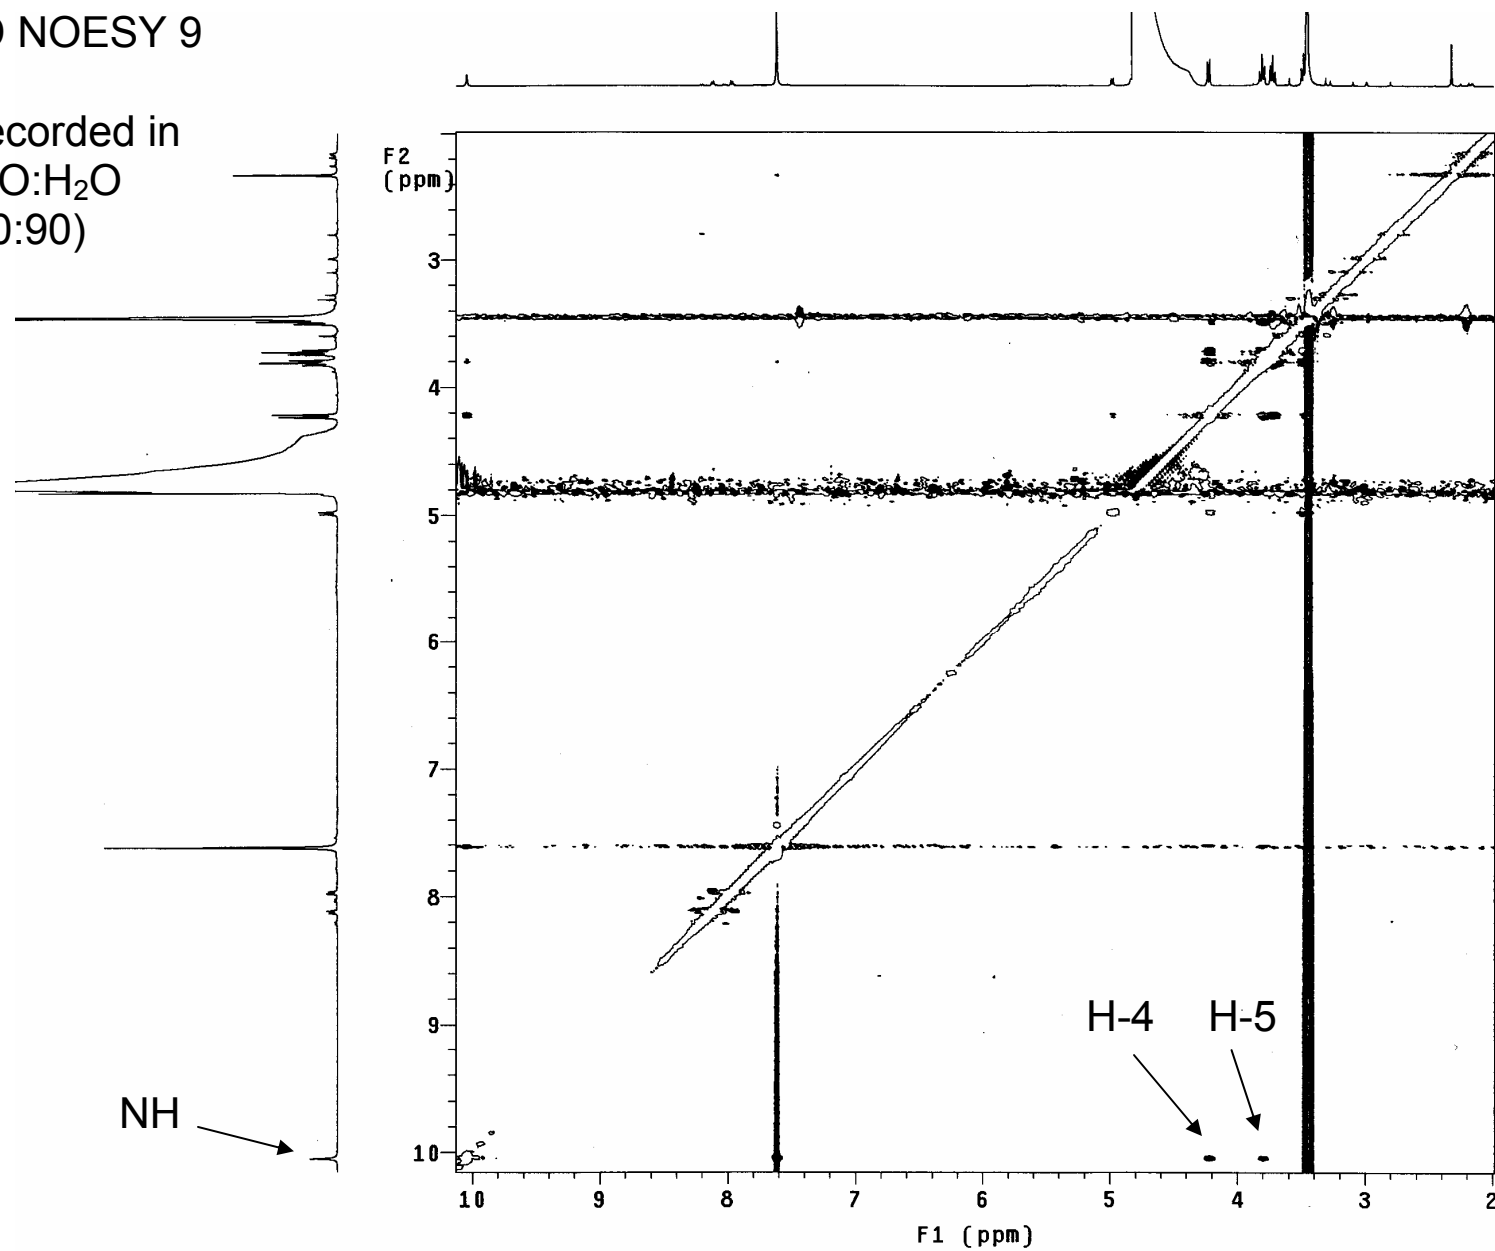

Supplement: Supplementary file 1 [file 5124286]
